# Supplementary material
Source: Research Square preprint supplement (doi:10.21203/rs.3.rs-9759330/v1)

Figure 2 WB-ANXA3


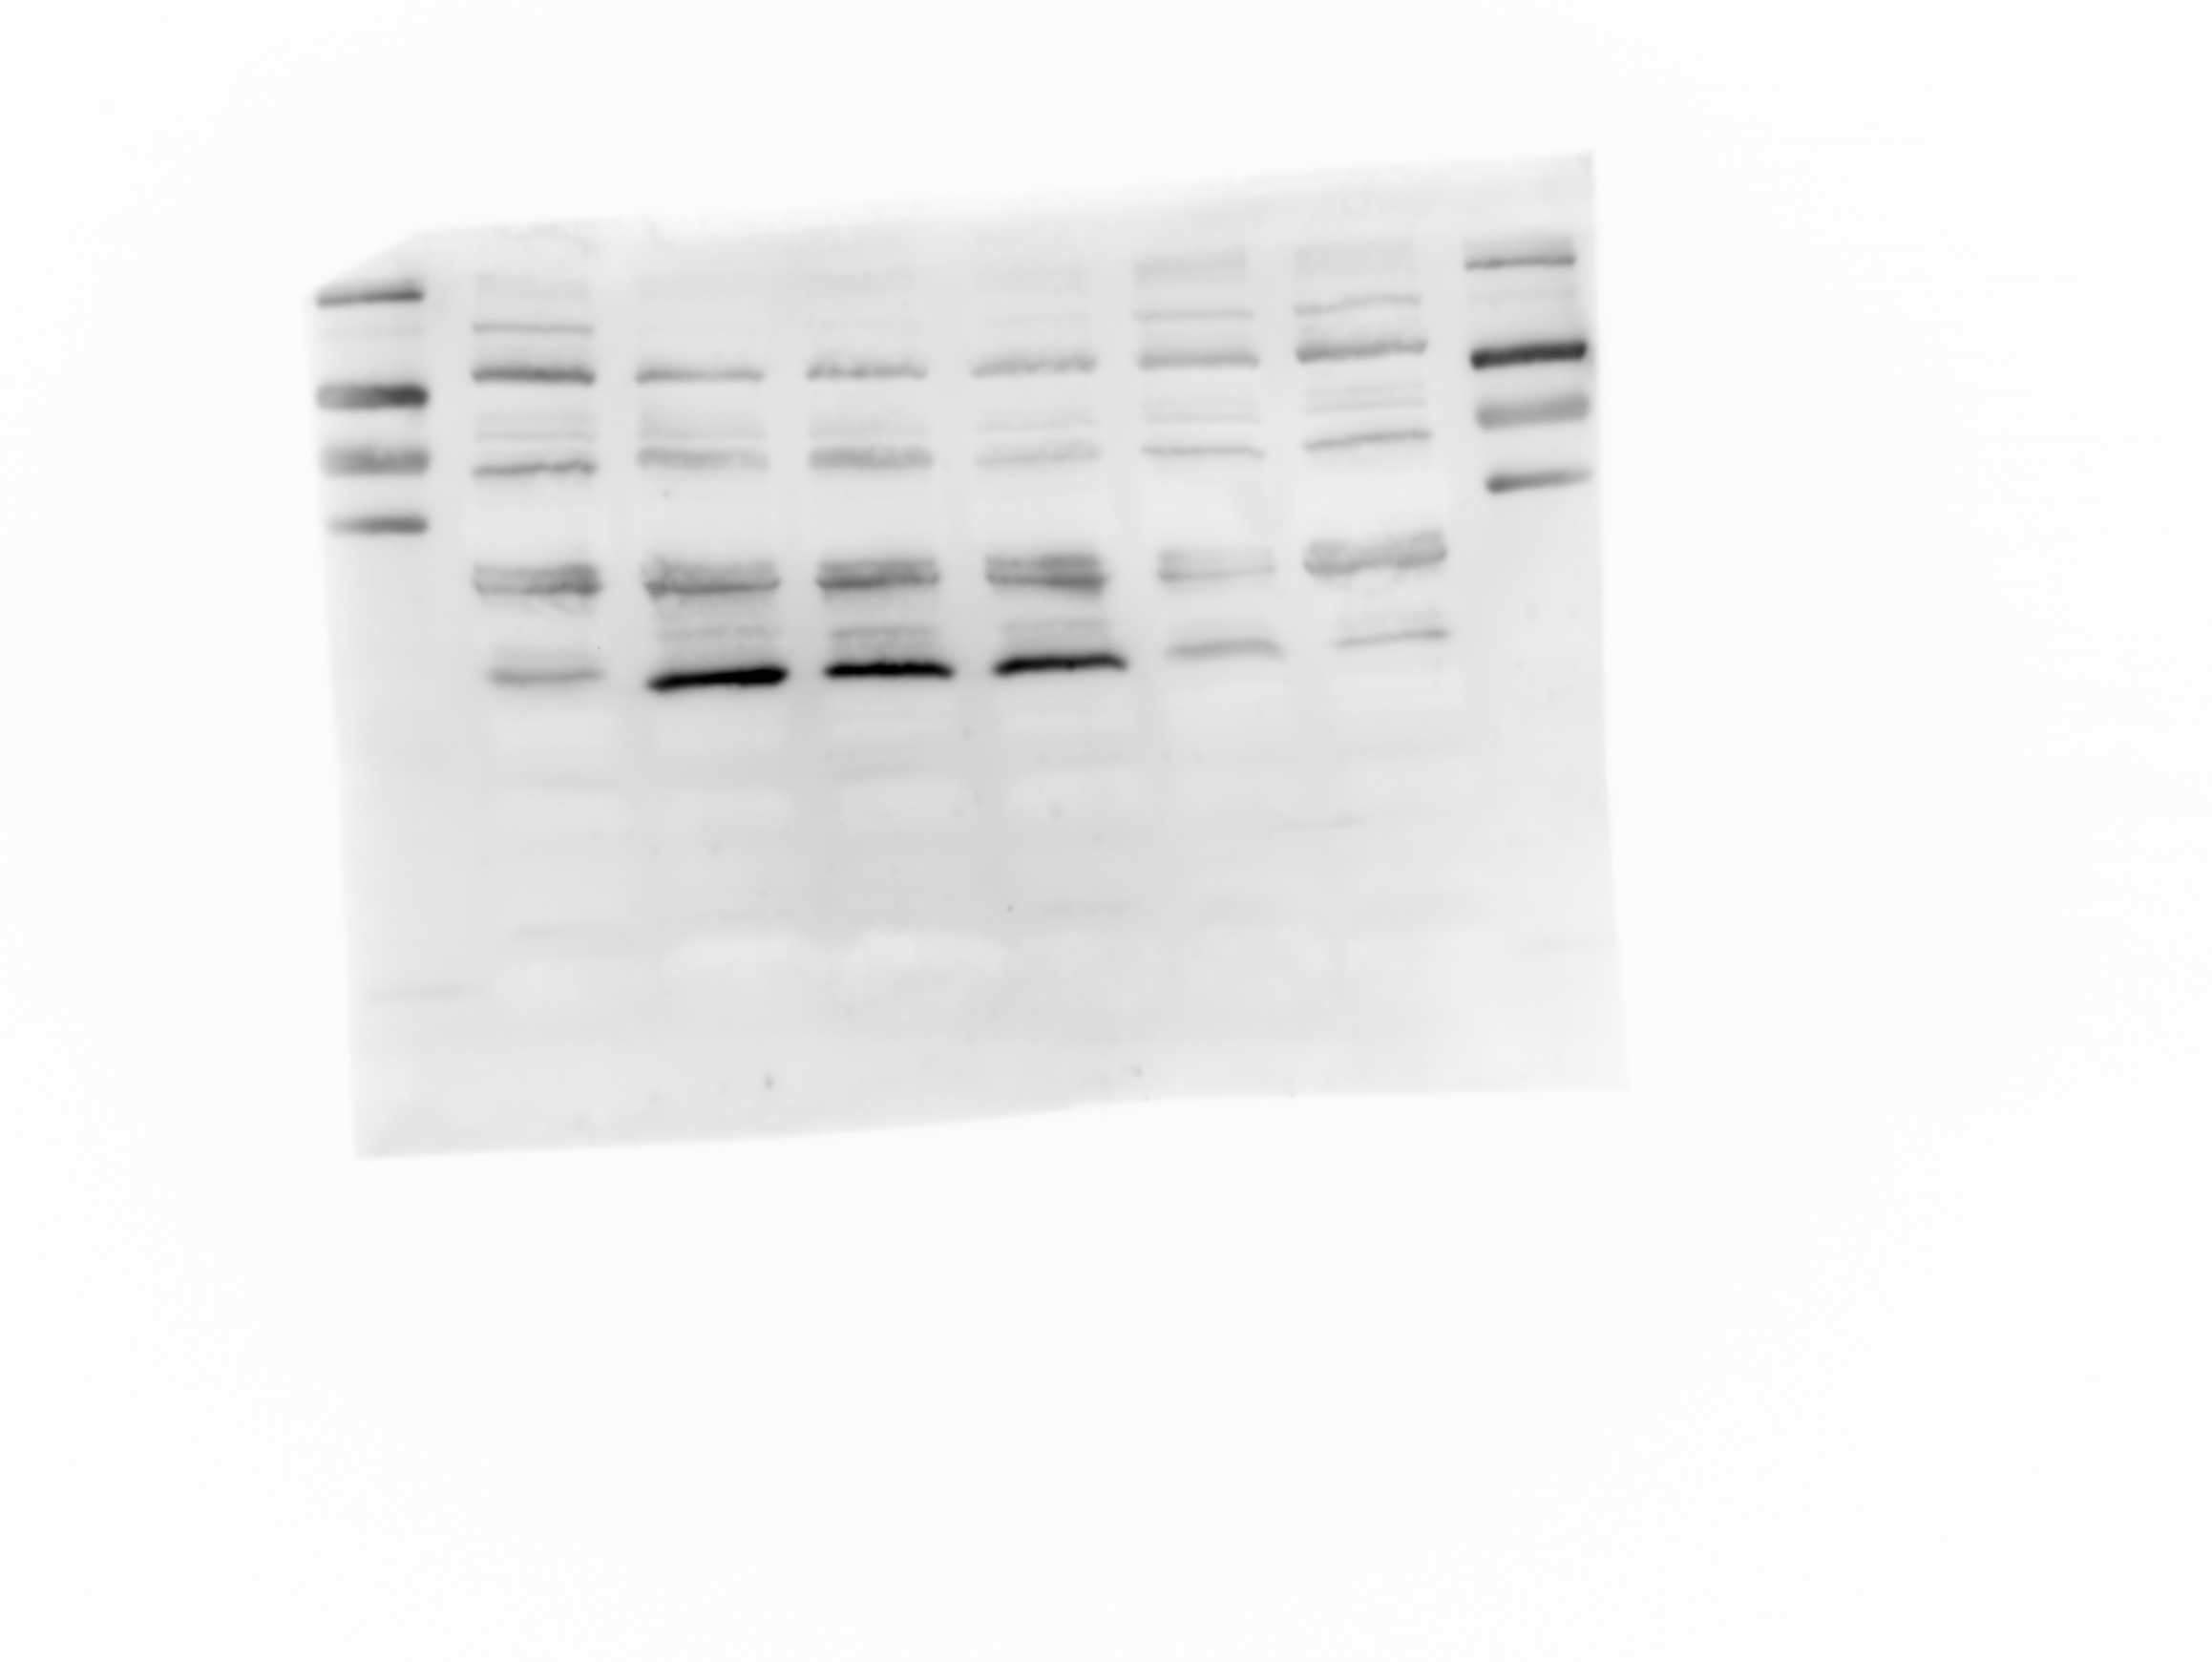


Figure 2 WB-β-actin


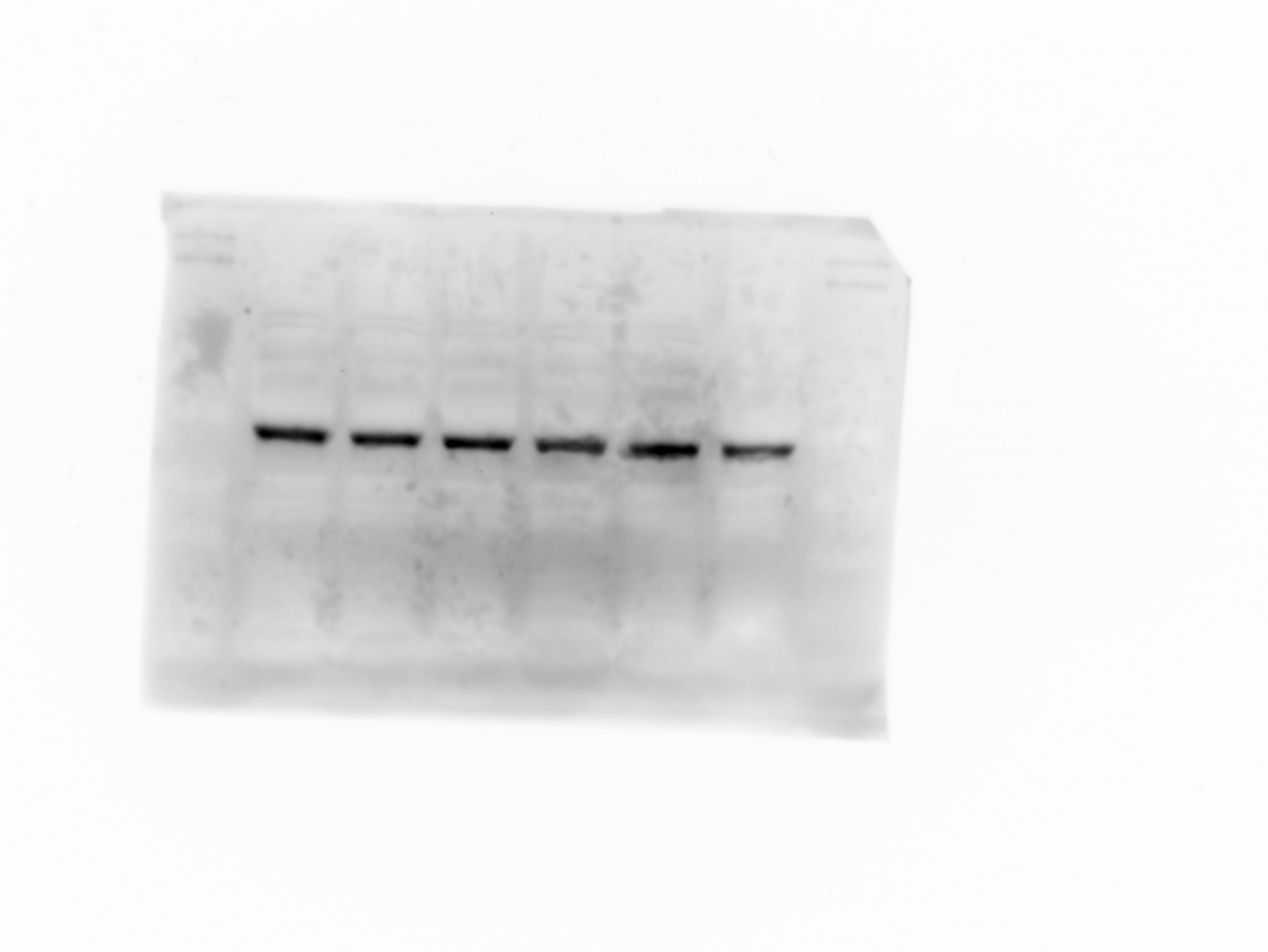


Figure 4 WB-BAX


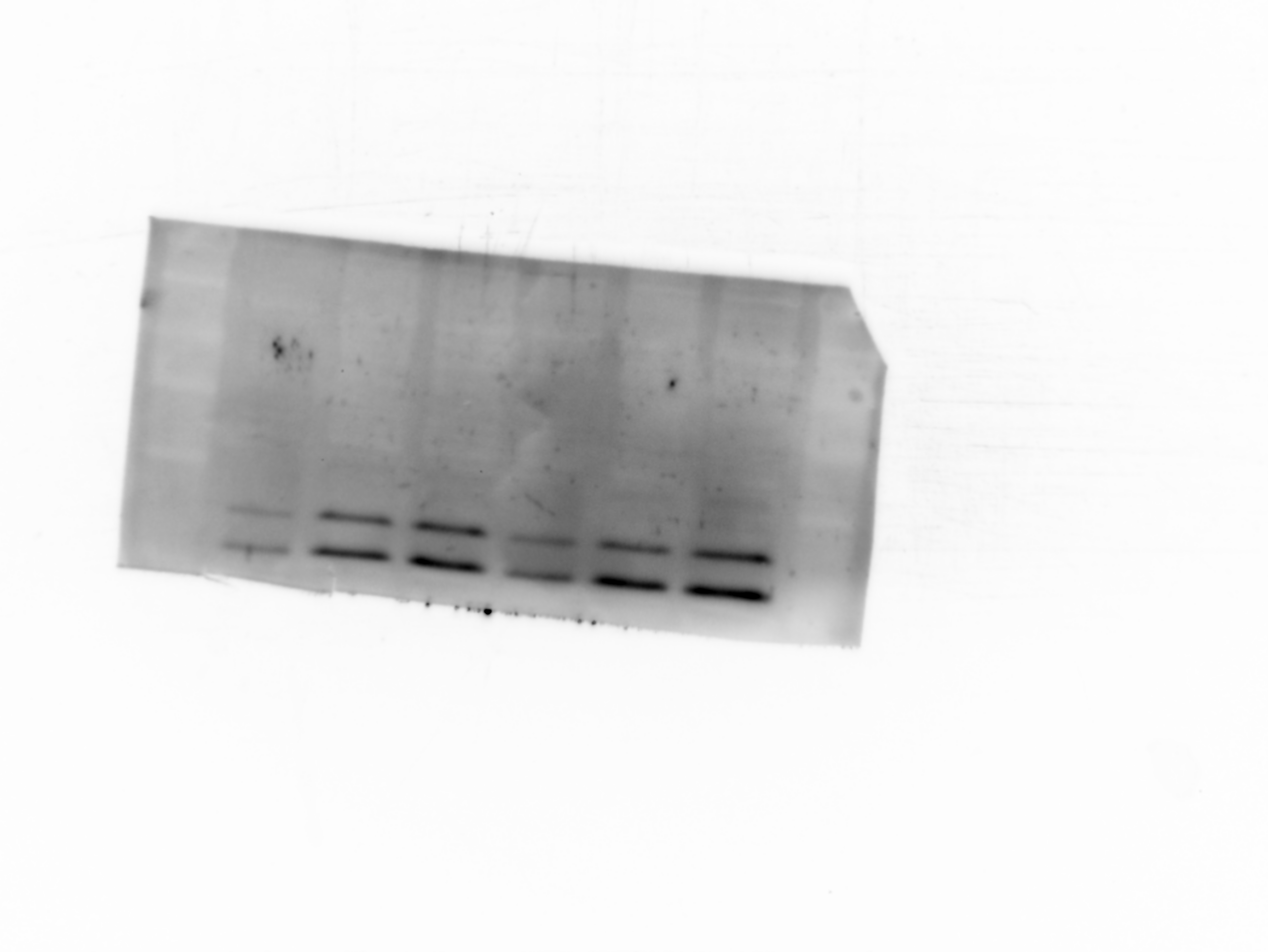


Figure 4 WB-Bcl-2


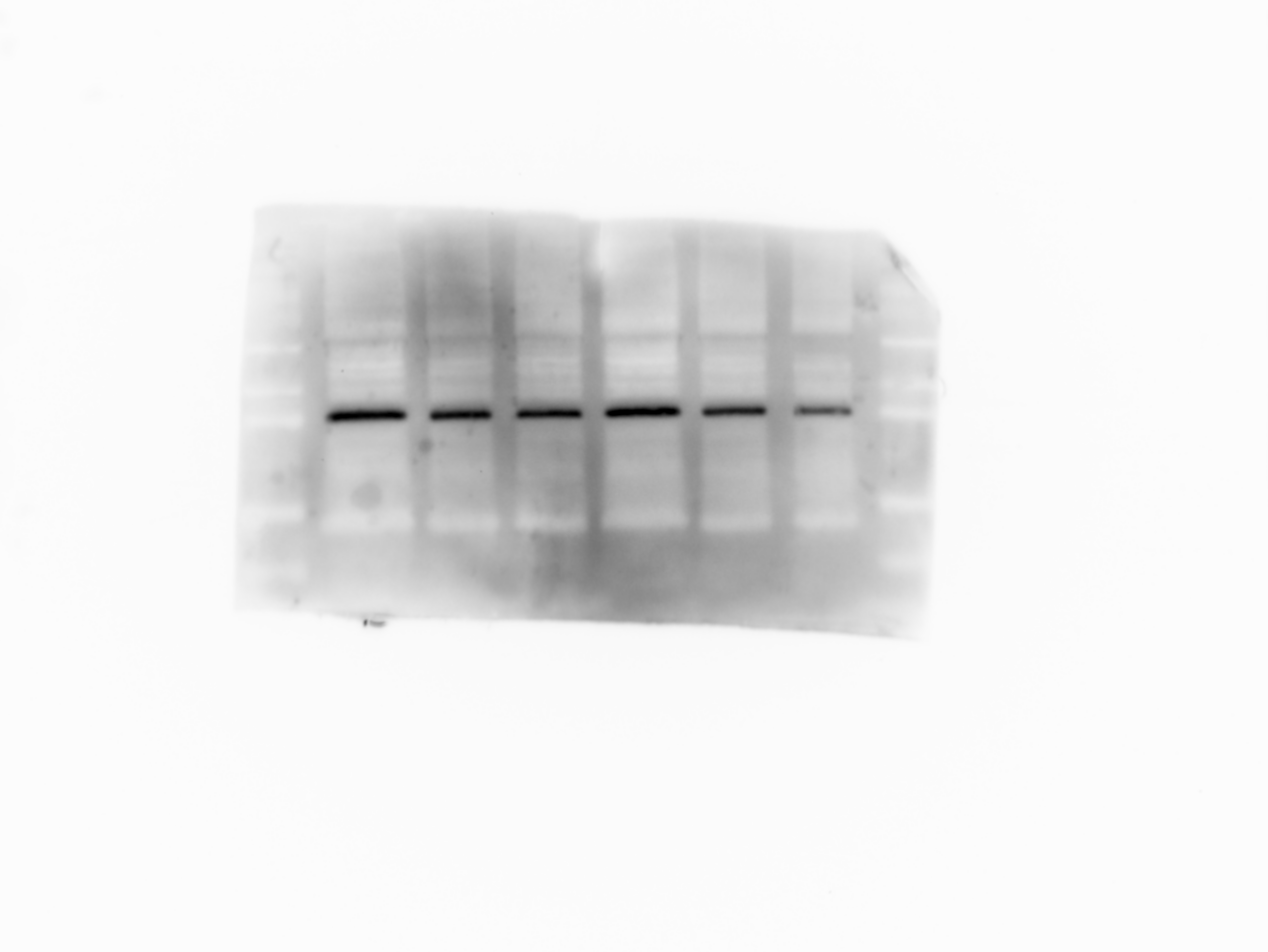


Figure 4 WB-cleaved caspase-3


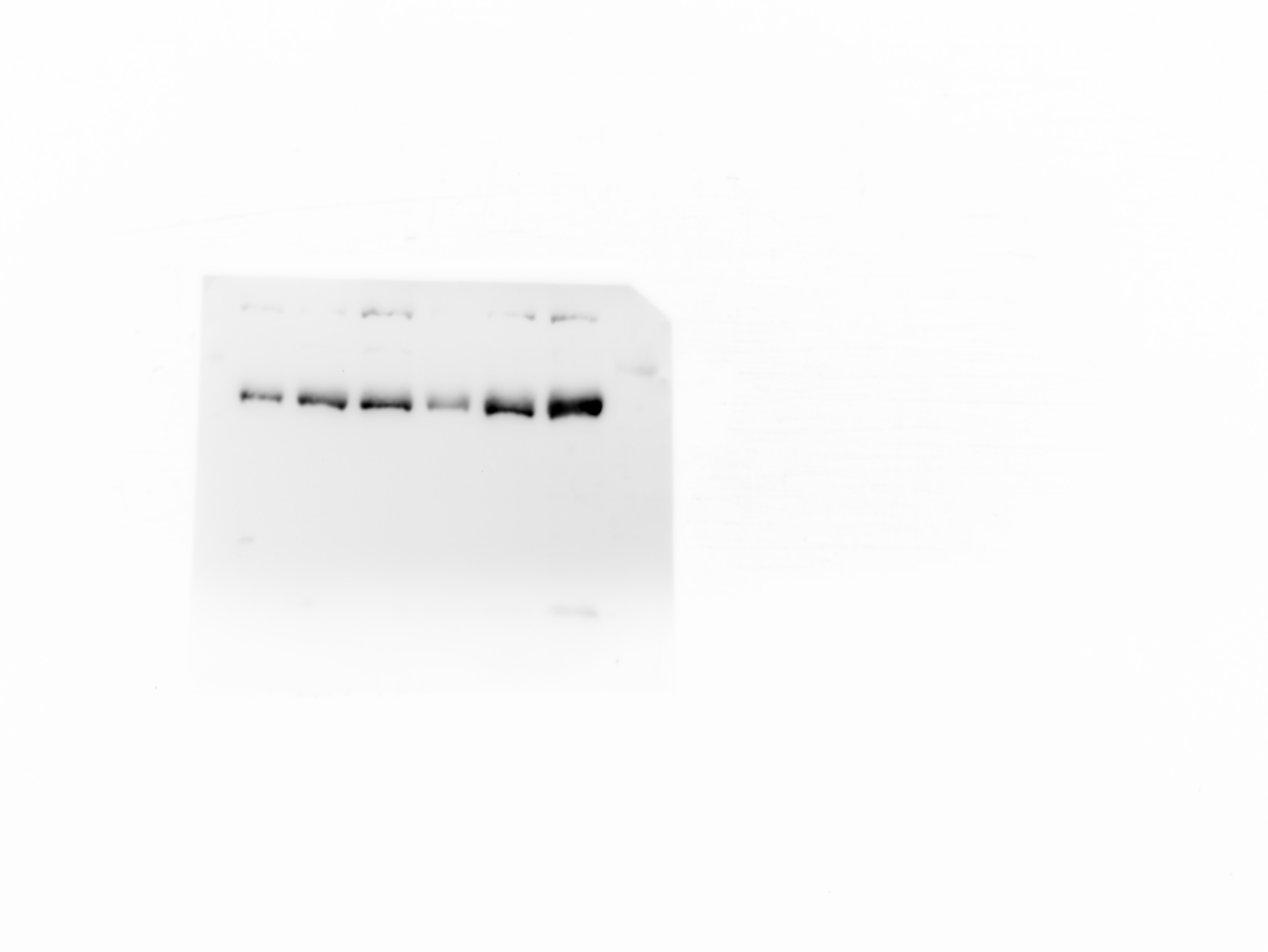


Figure 4 WB-β-actin


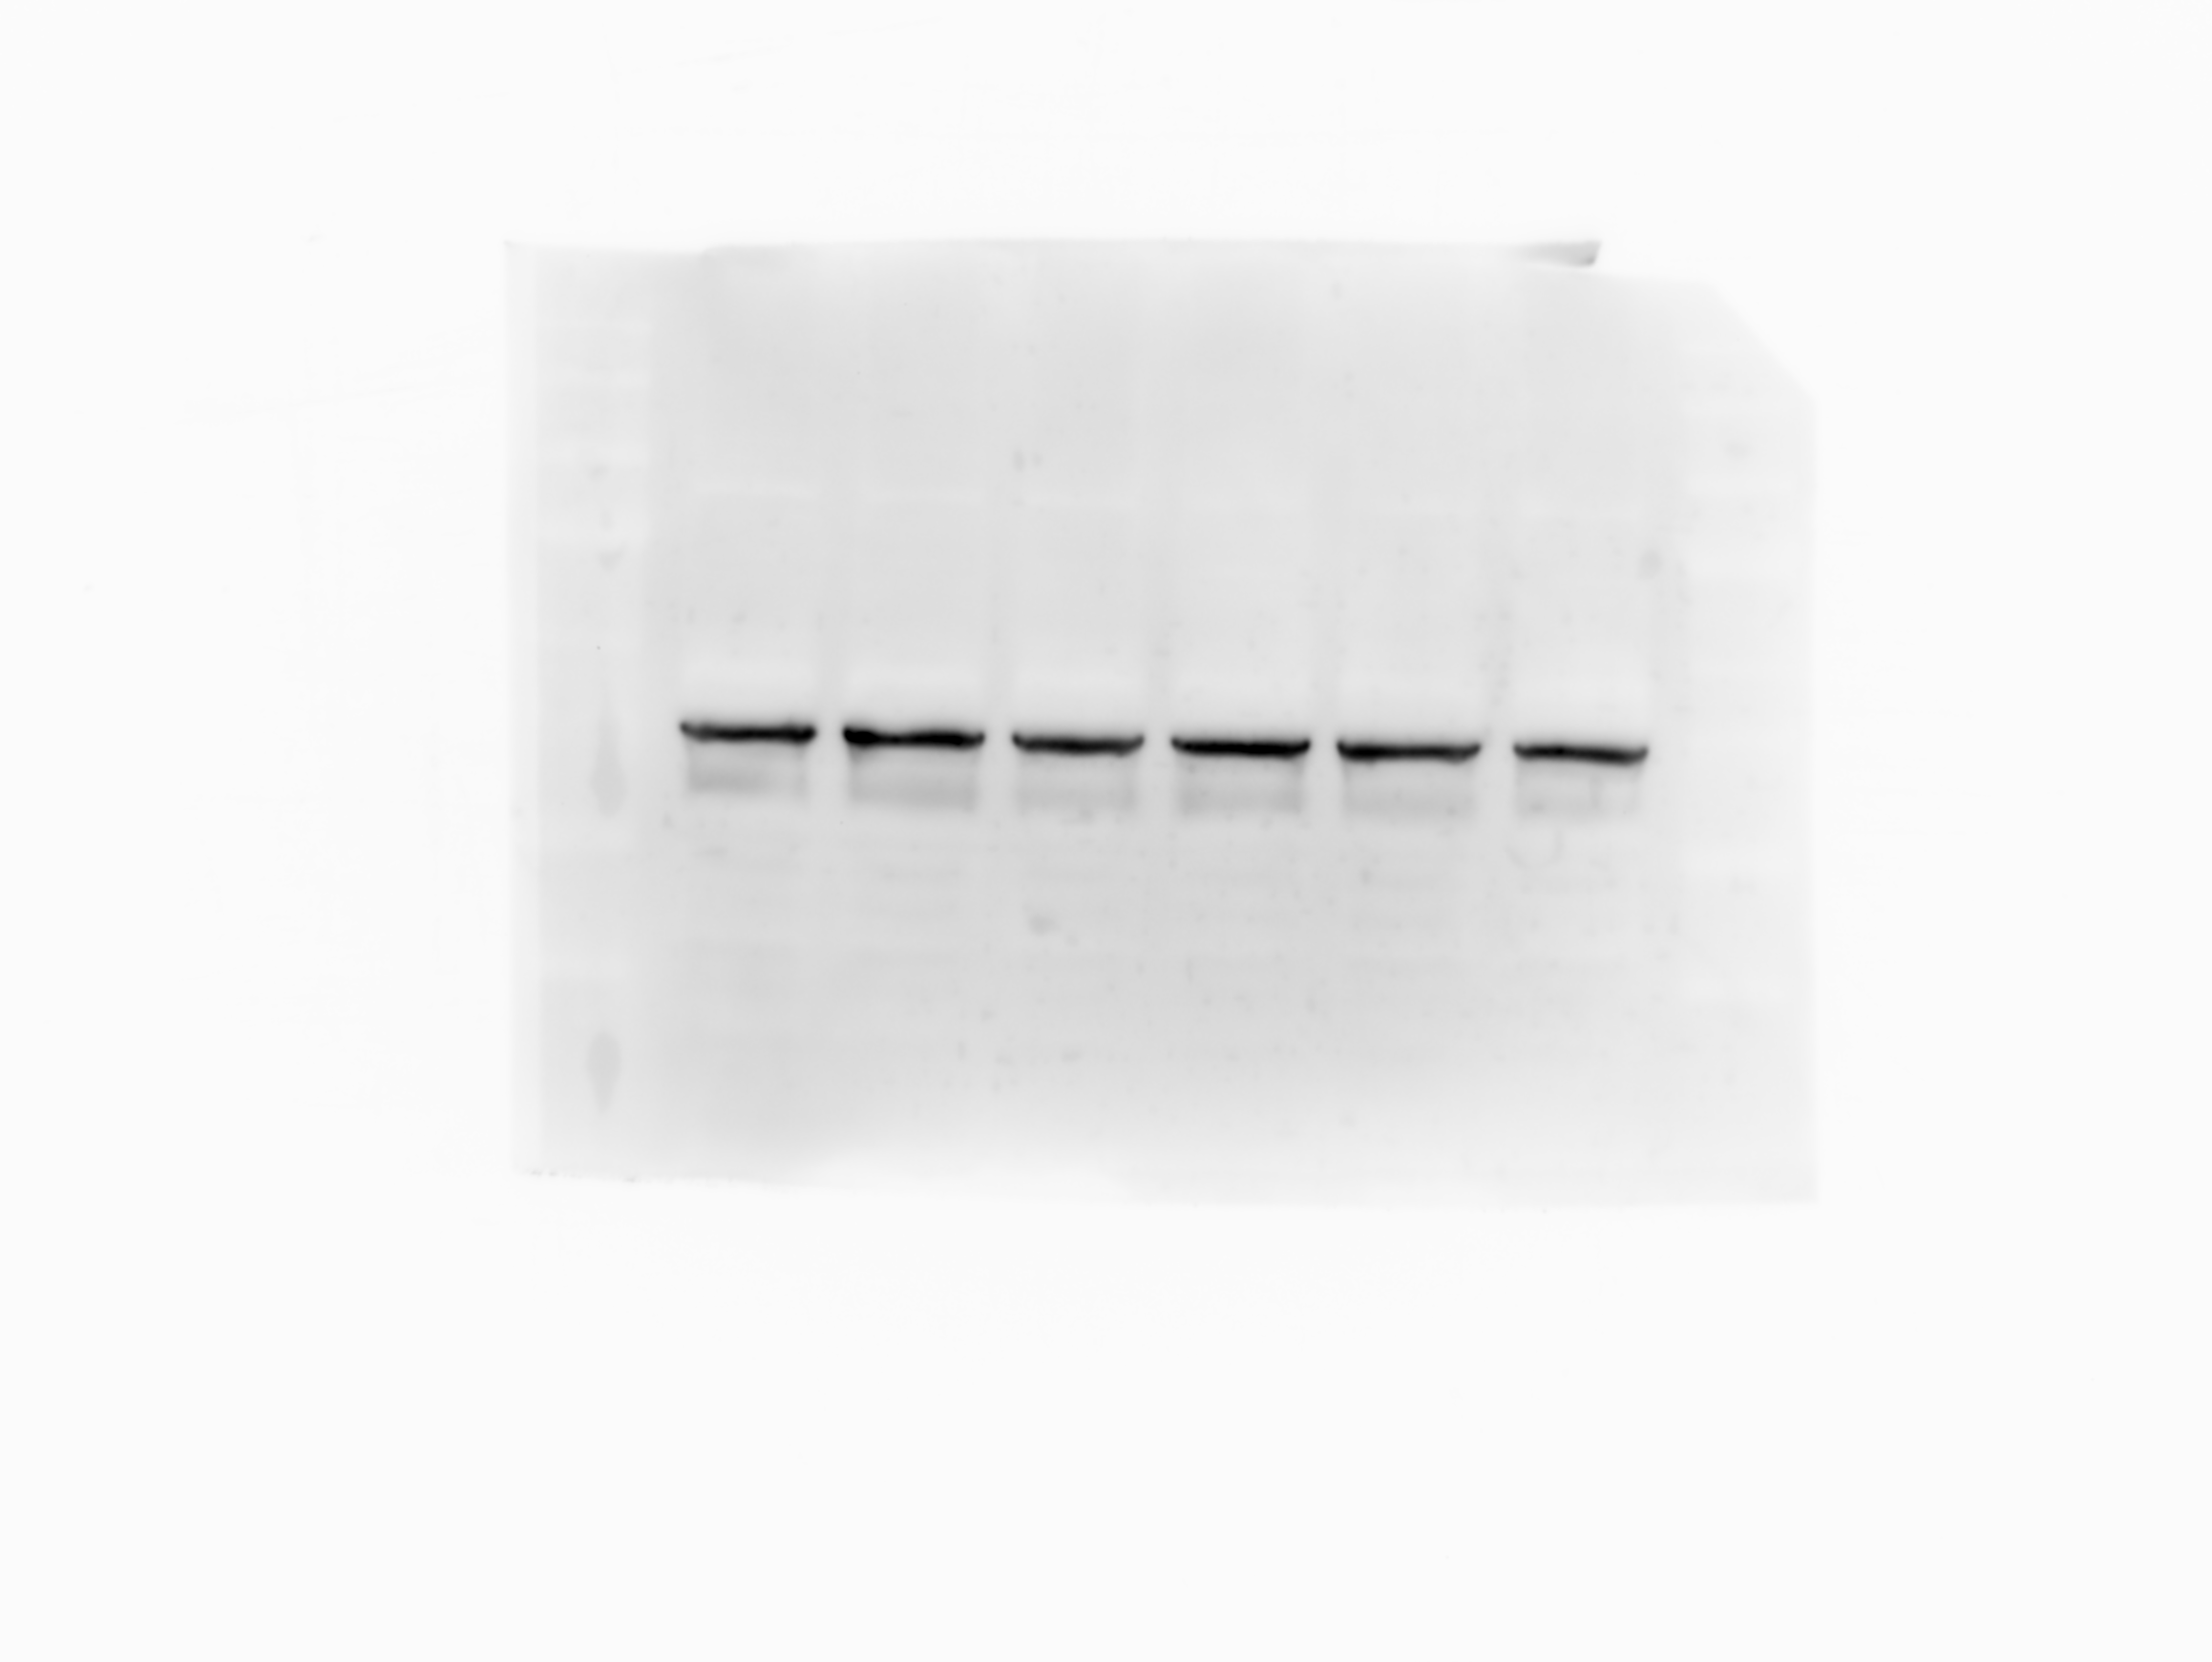


Figure 5 WB-ANXA3


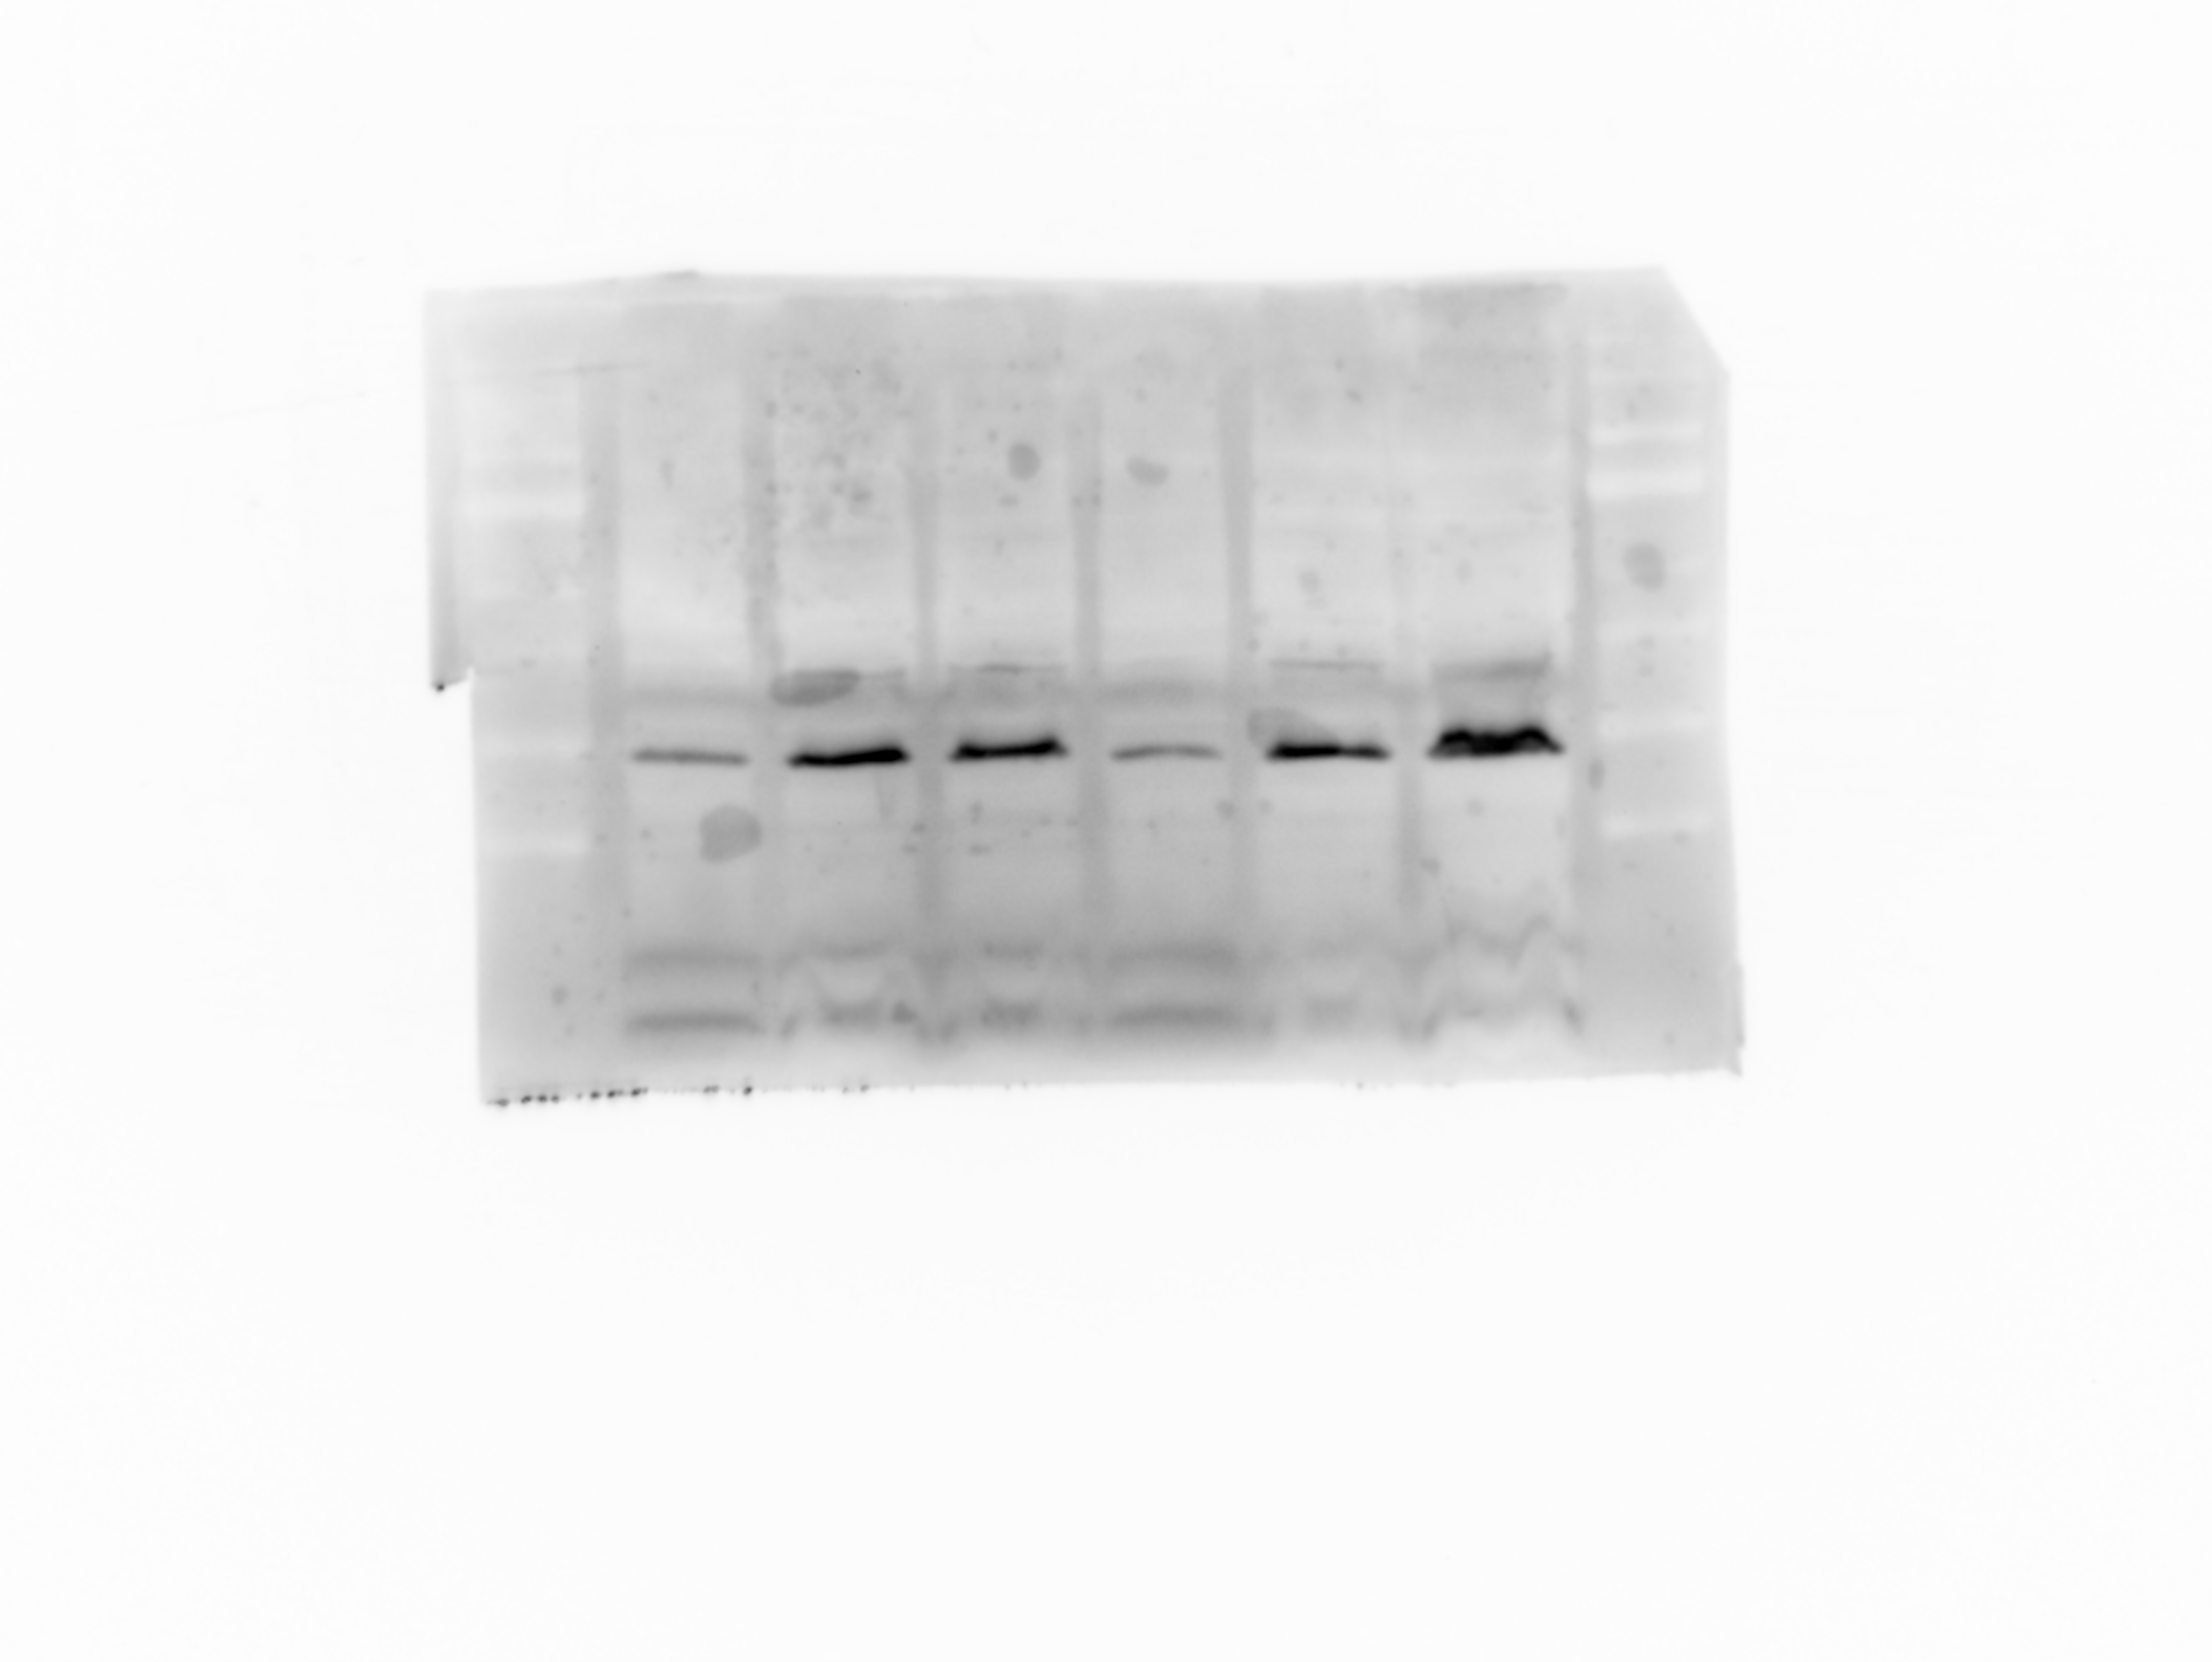


Figure 5 WB-P-ATF2


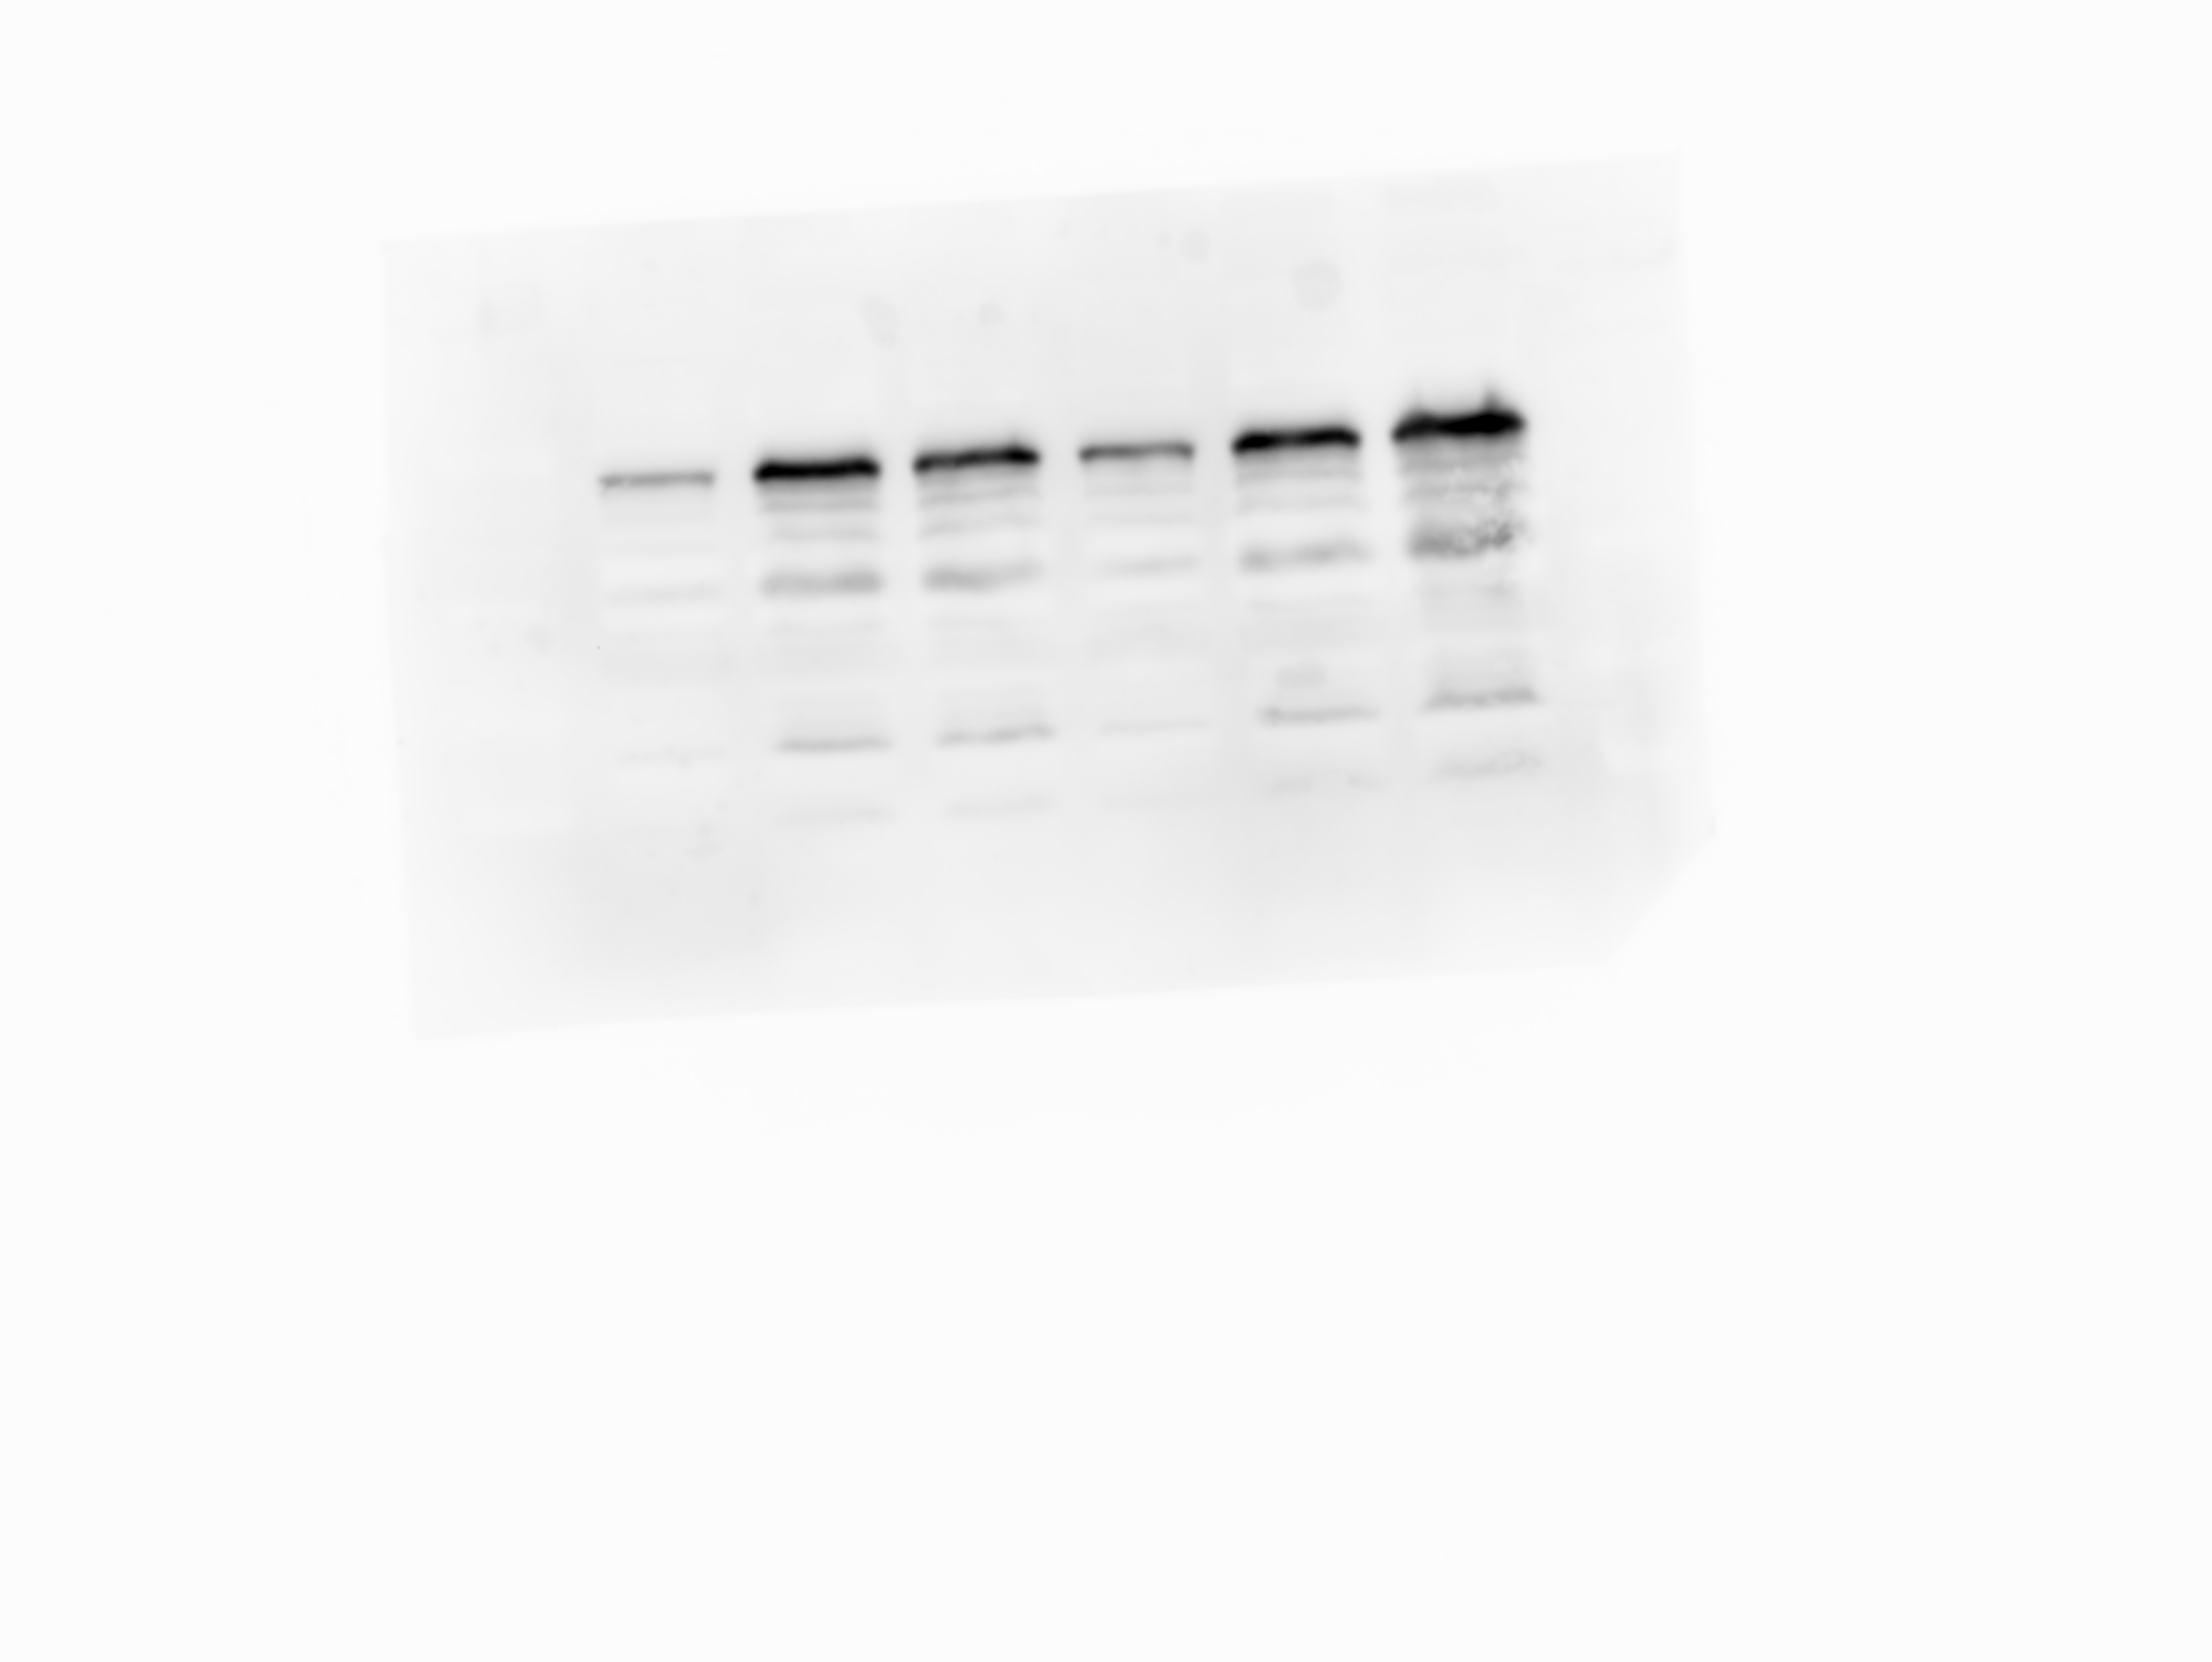


Figure 5 WB-ATF2


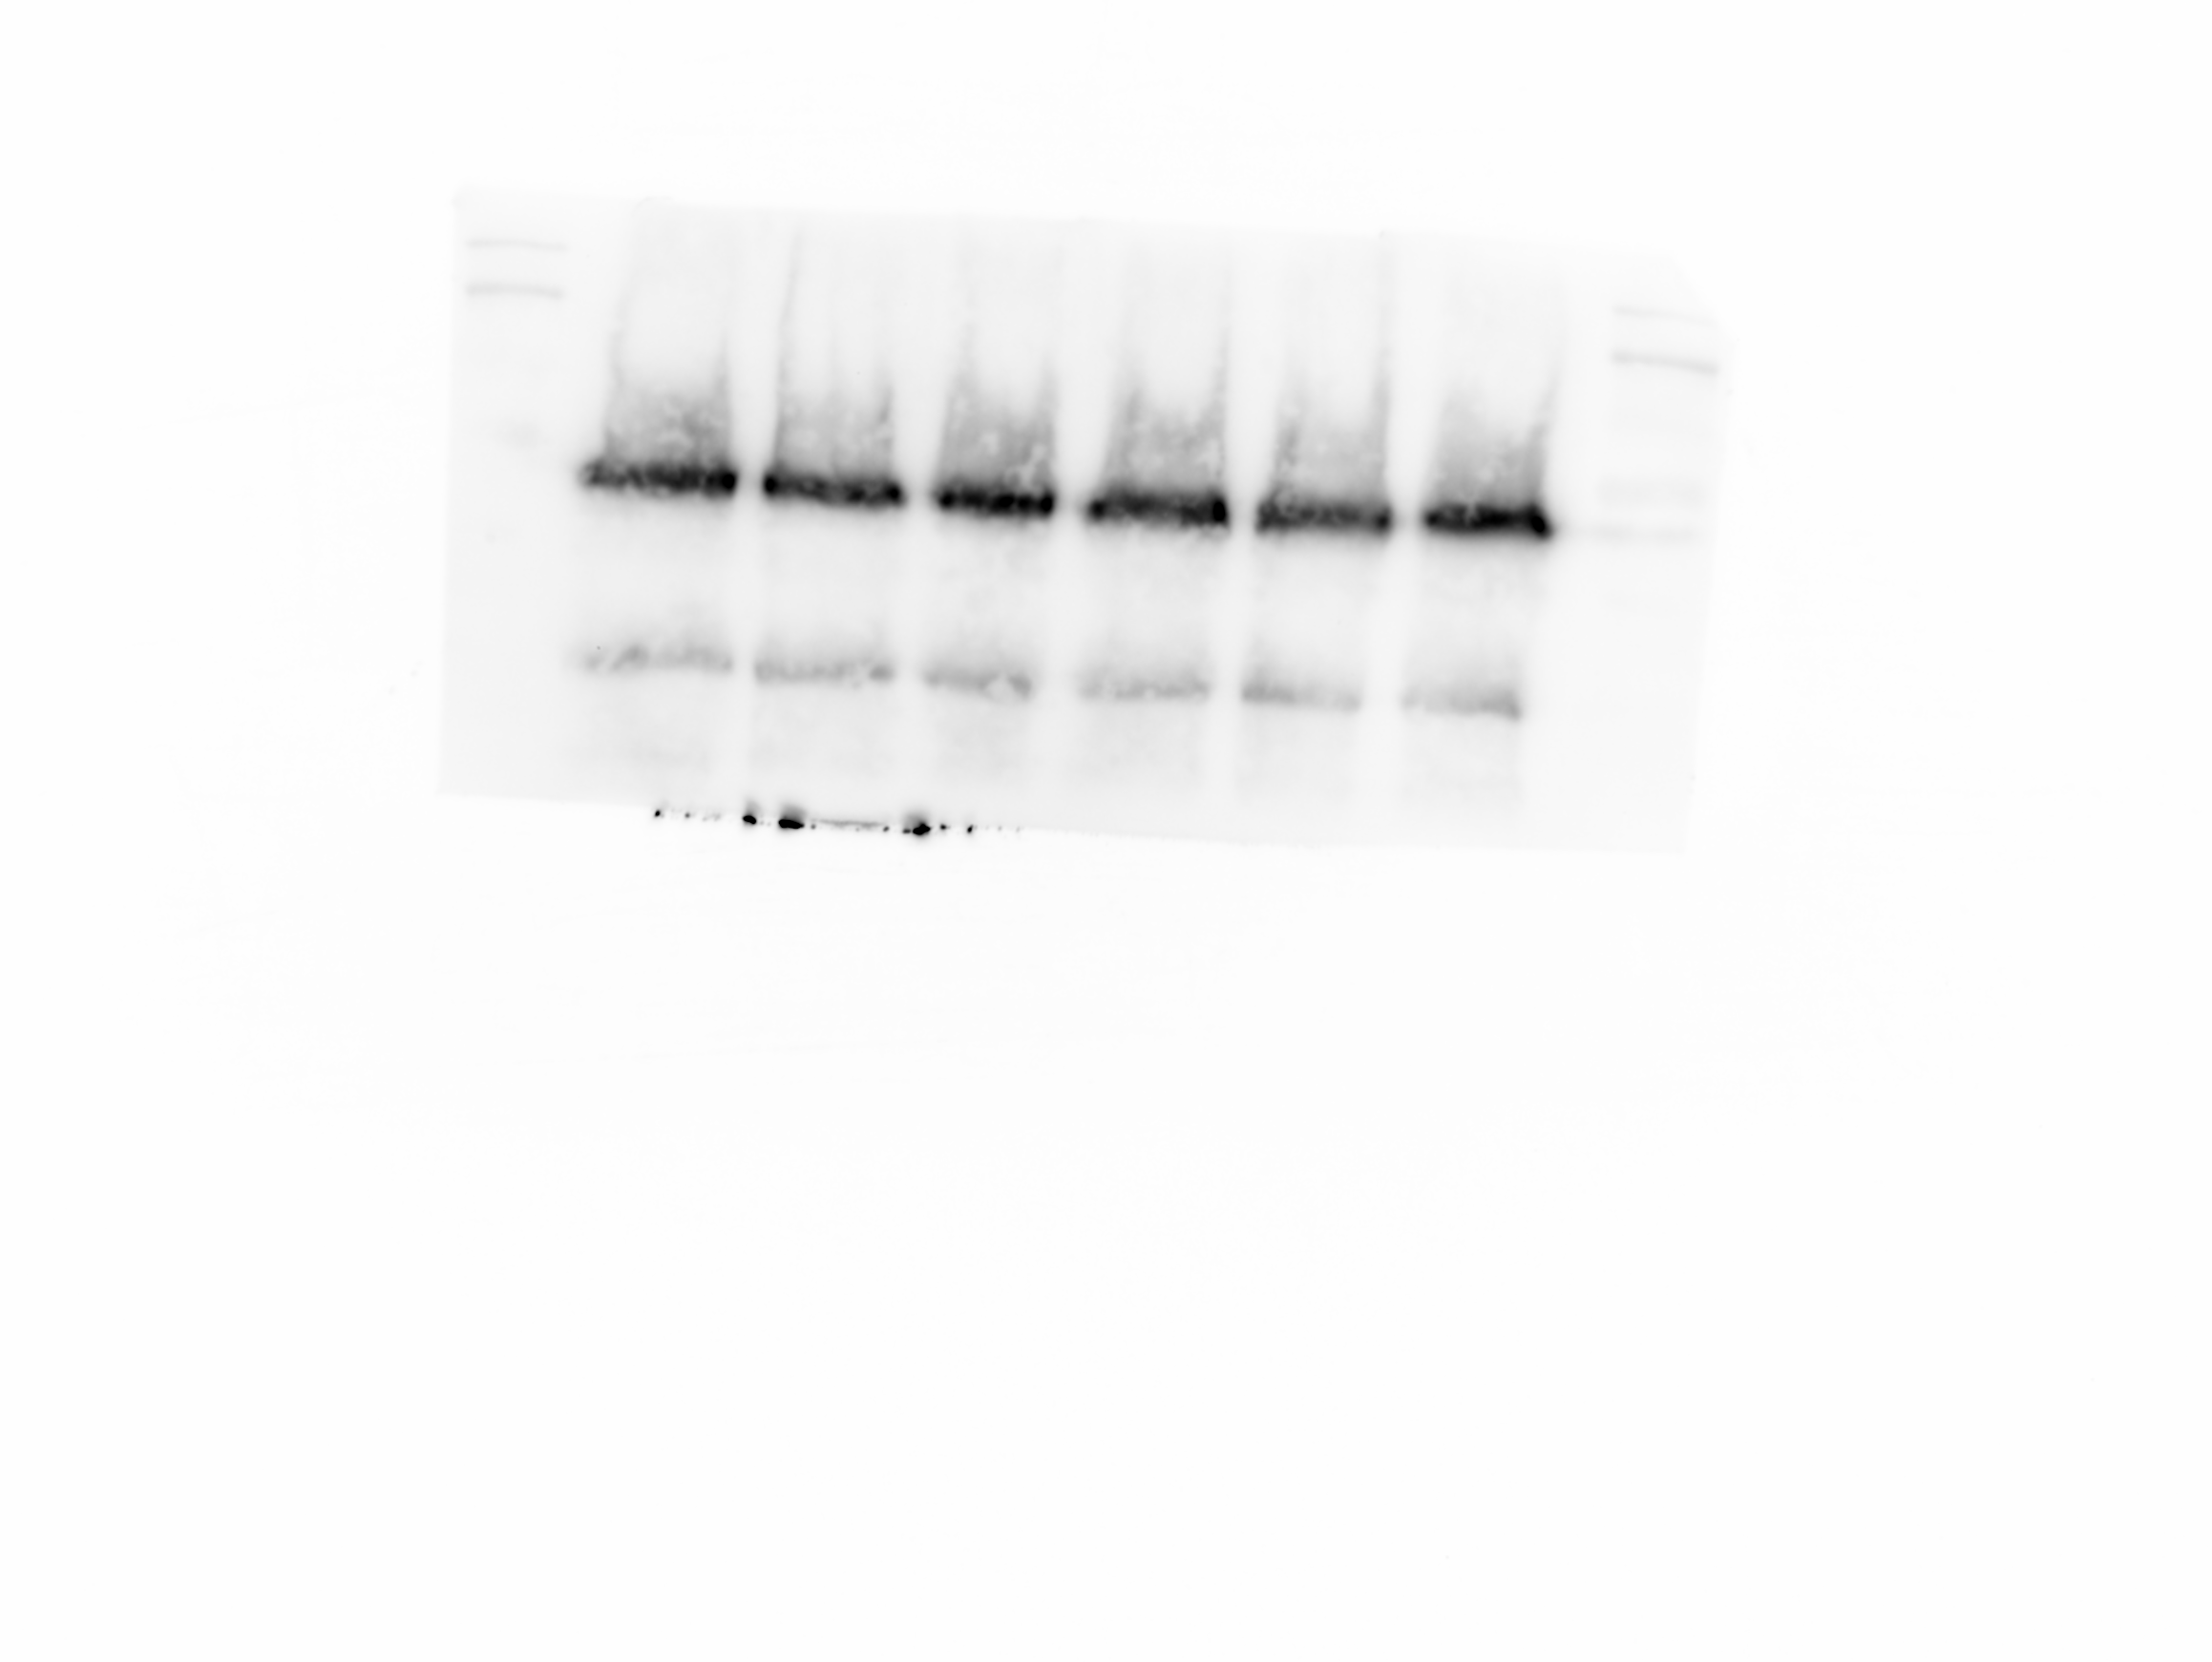


Figure 5 WB-P-NFκB-p65


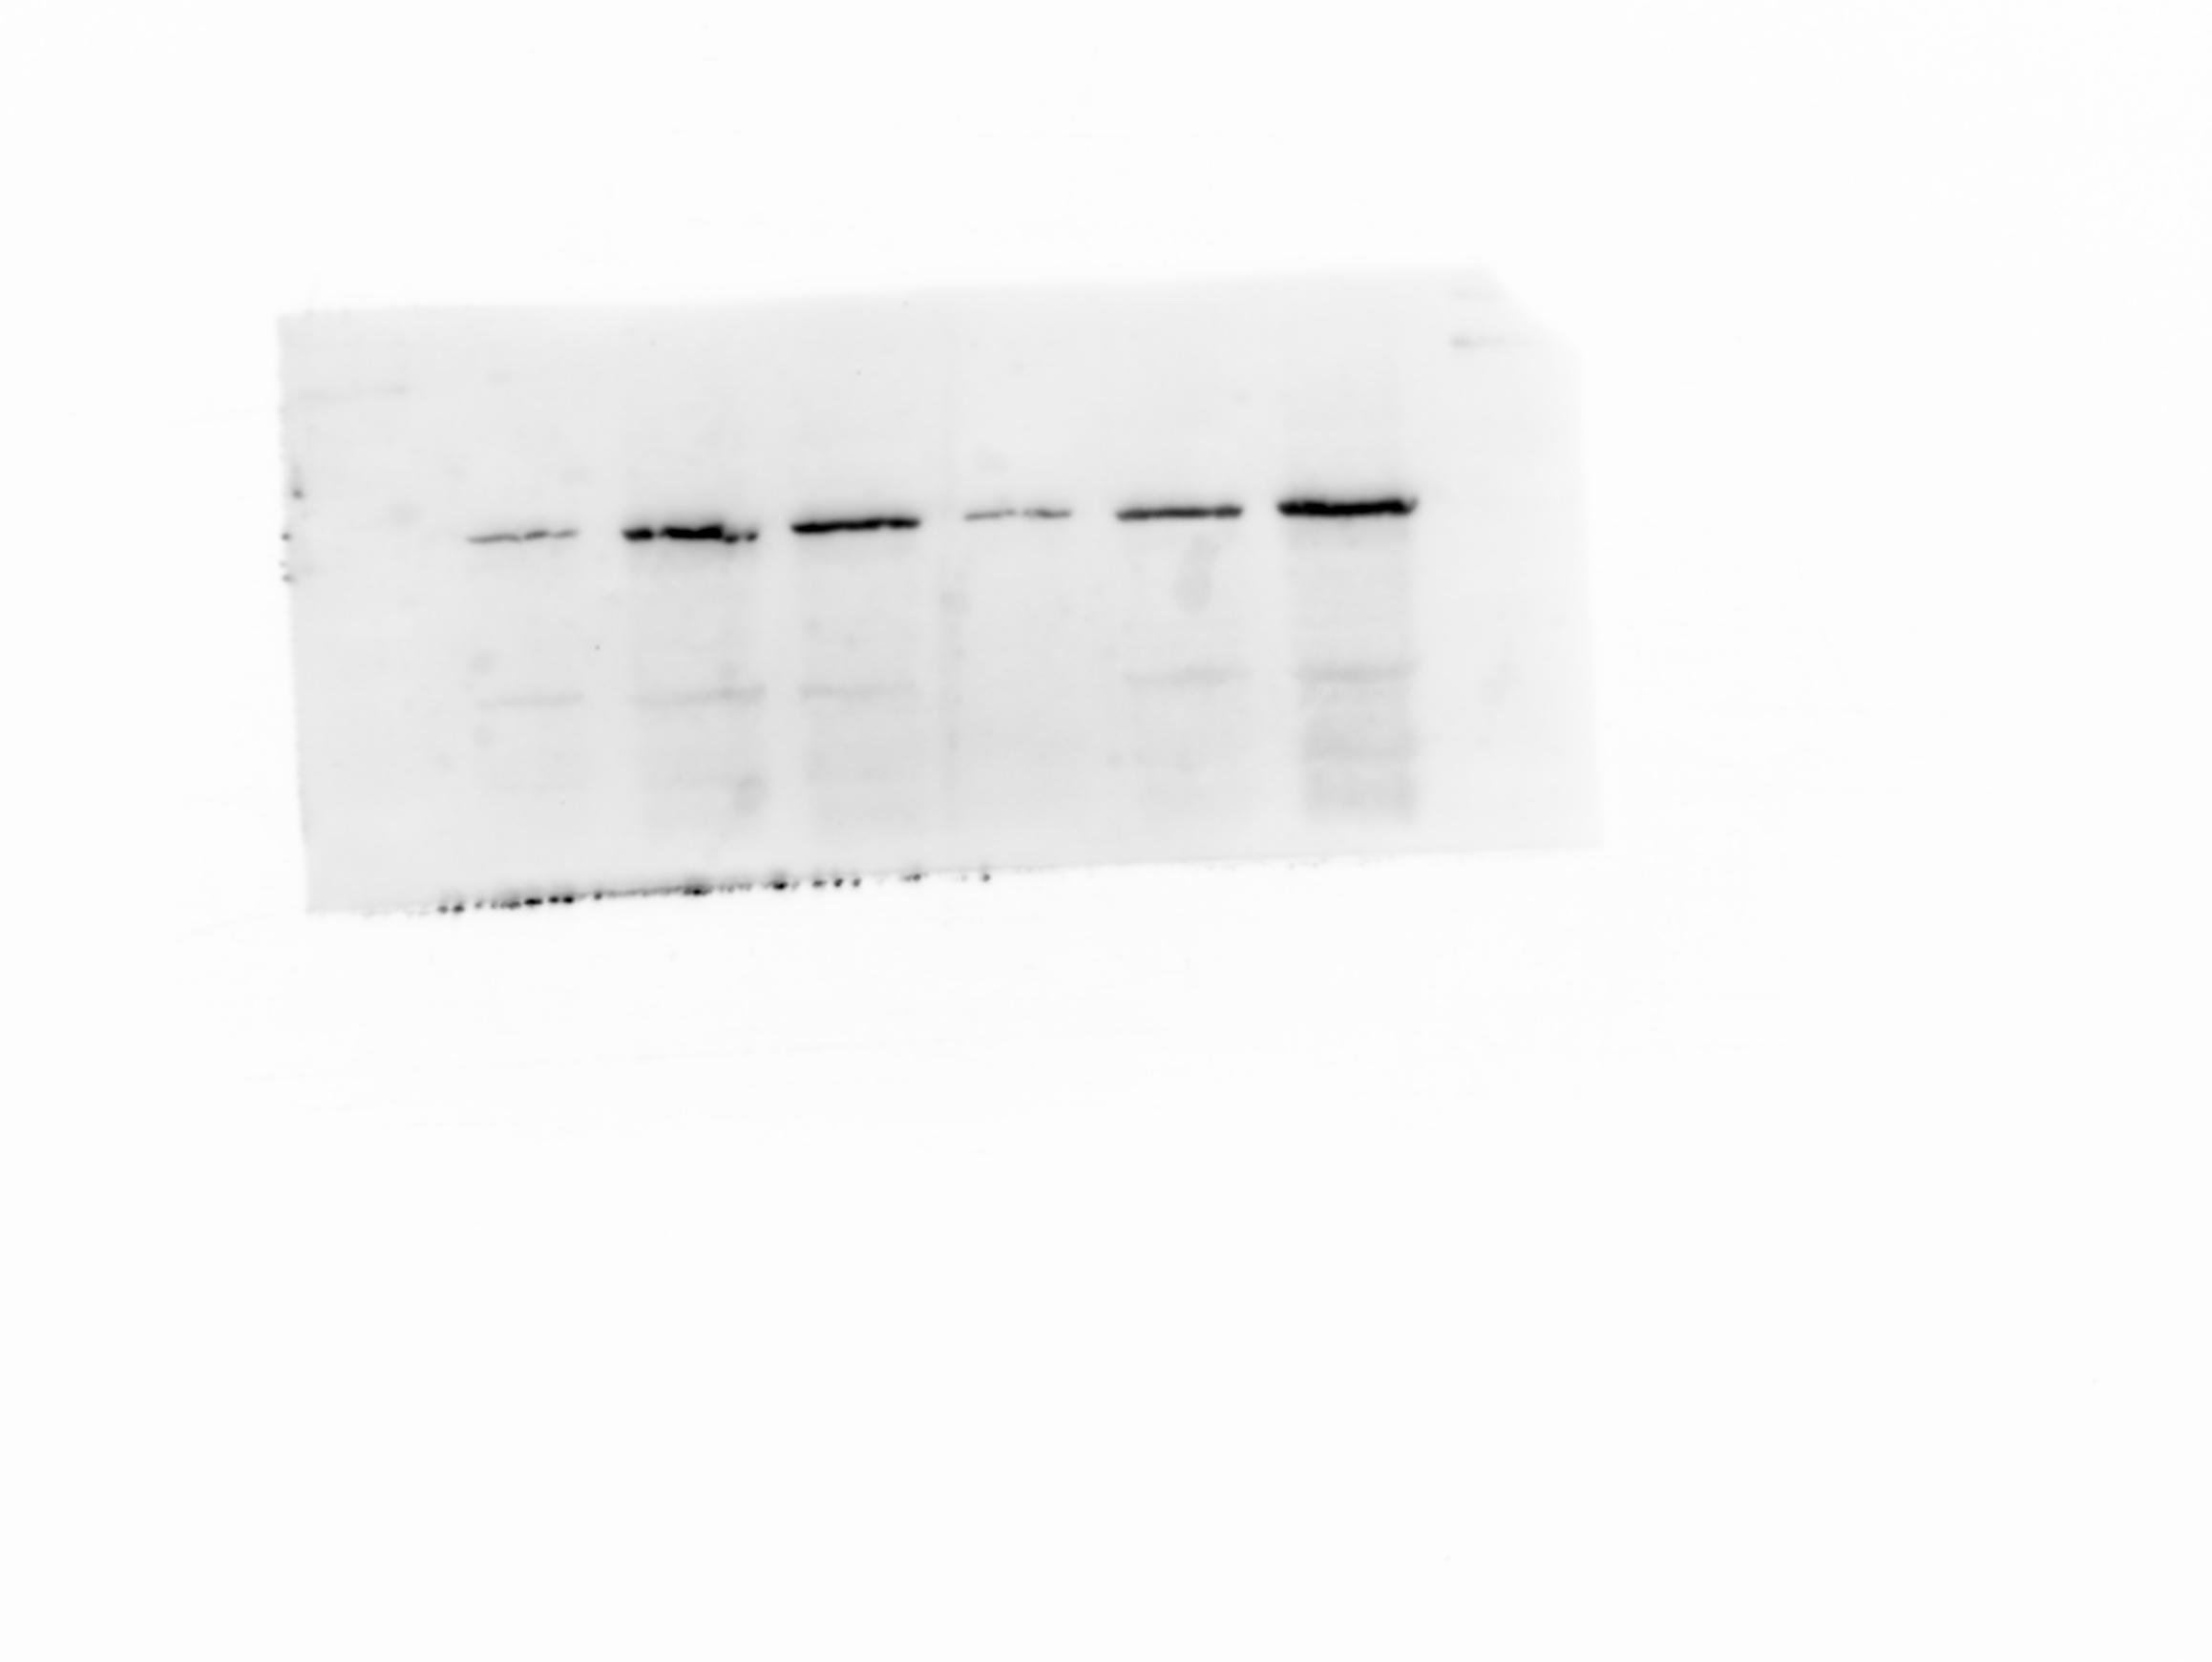


Figure 5 WB-NFκB-p65


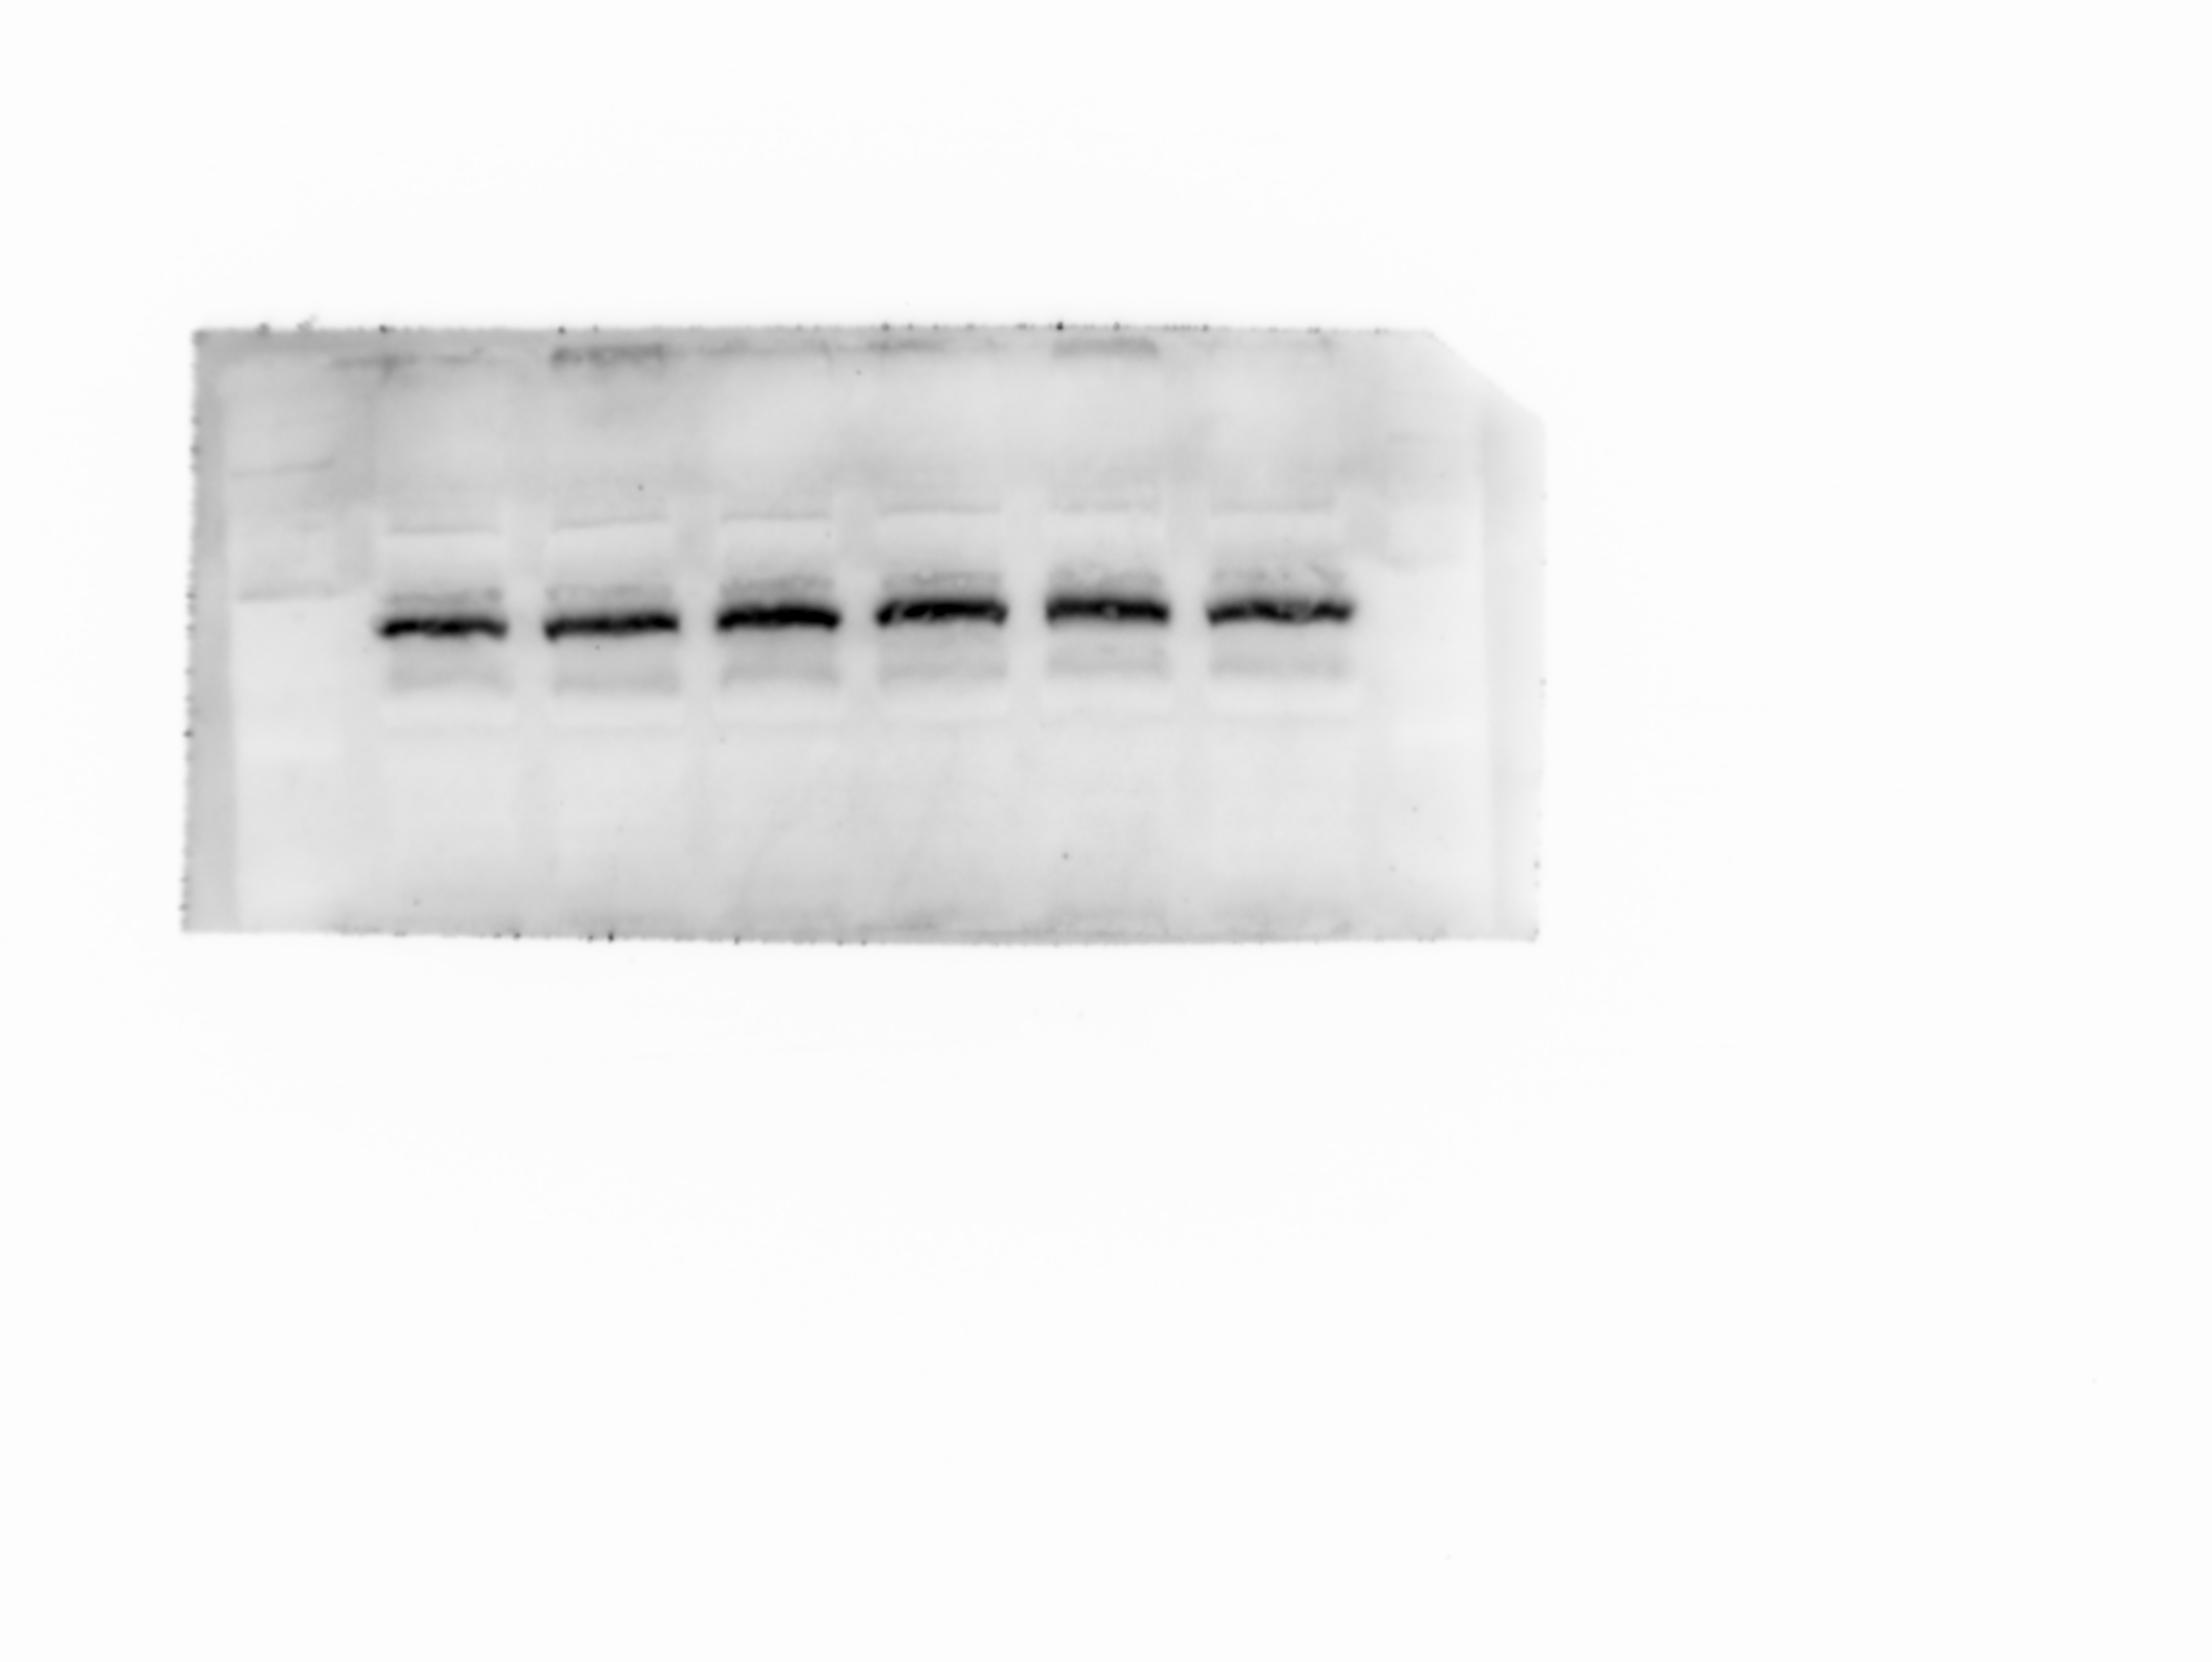


Figure 5 WB β-APP


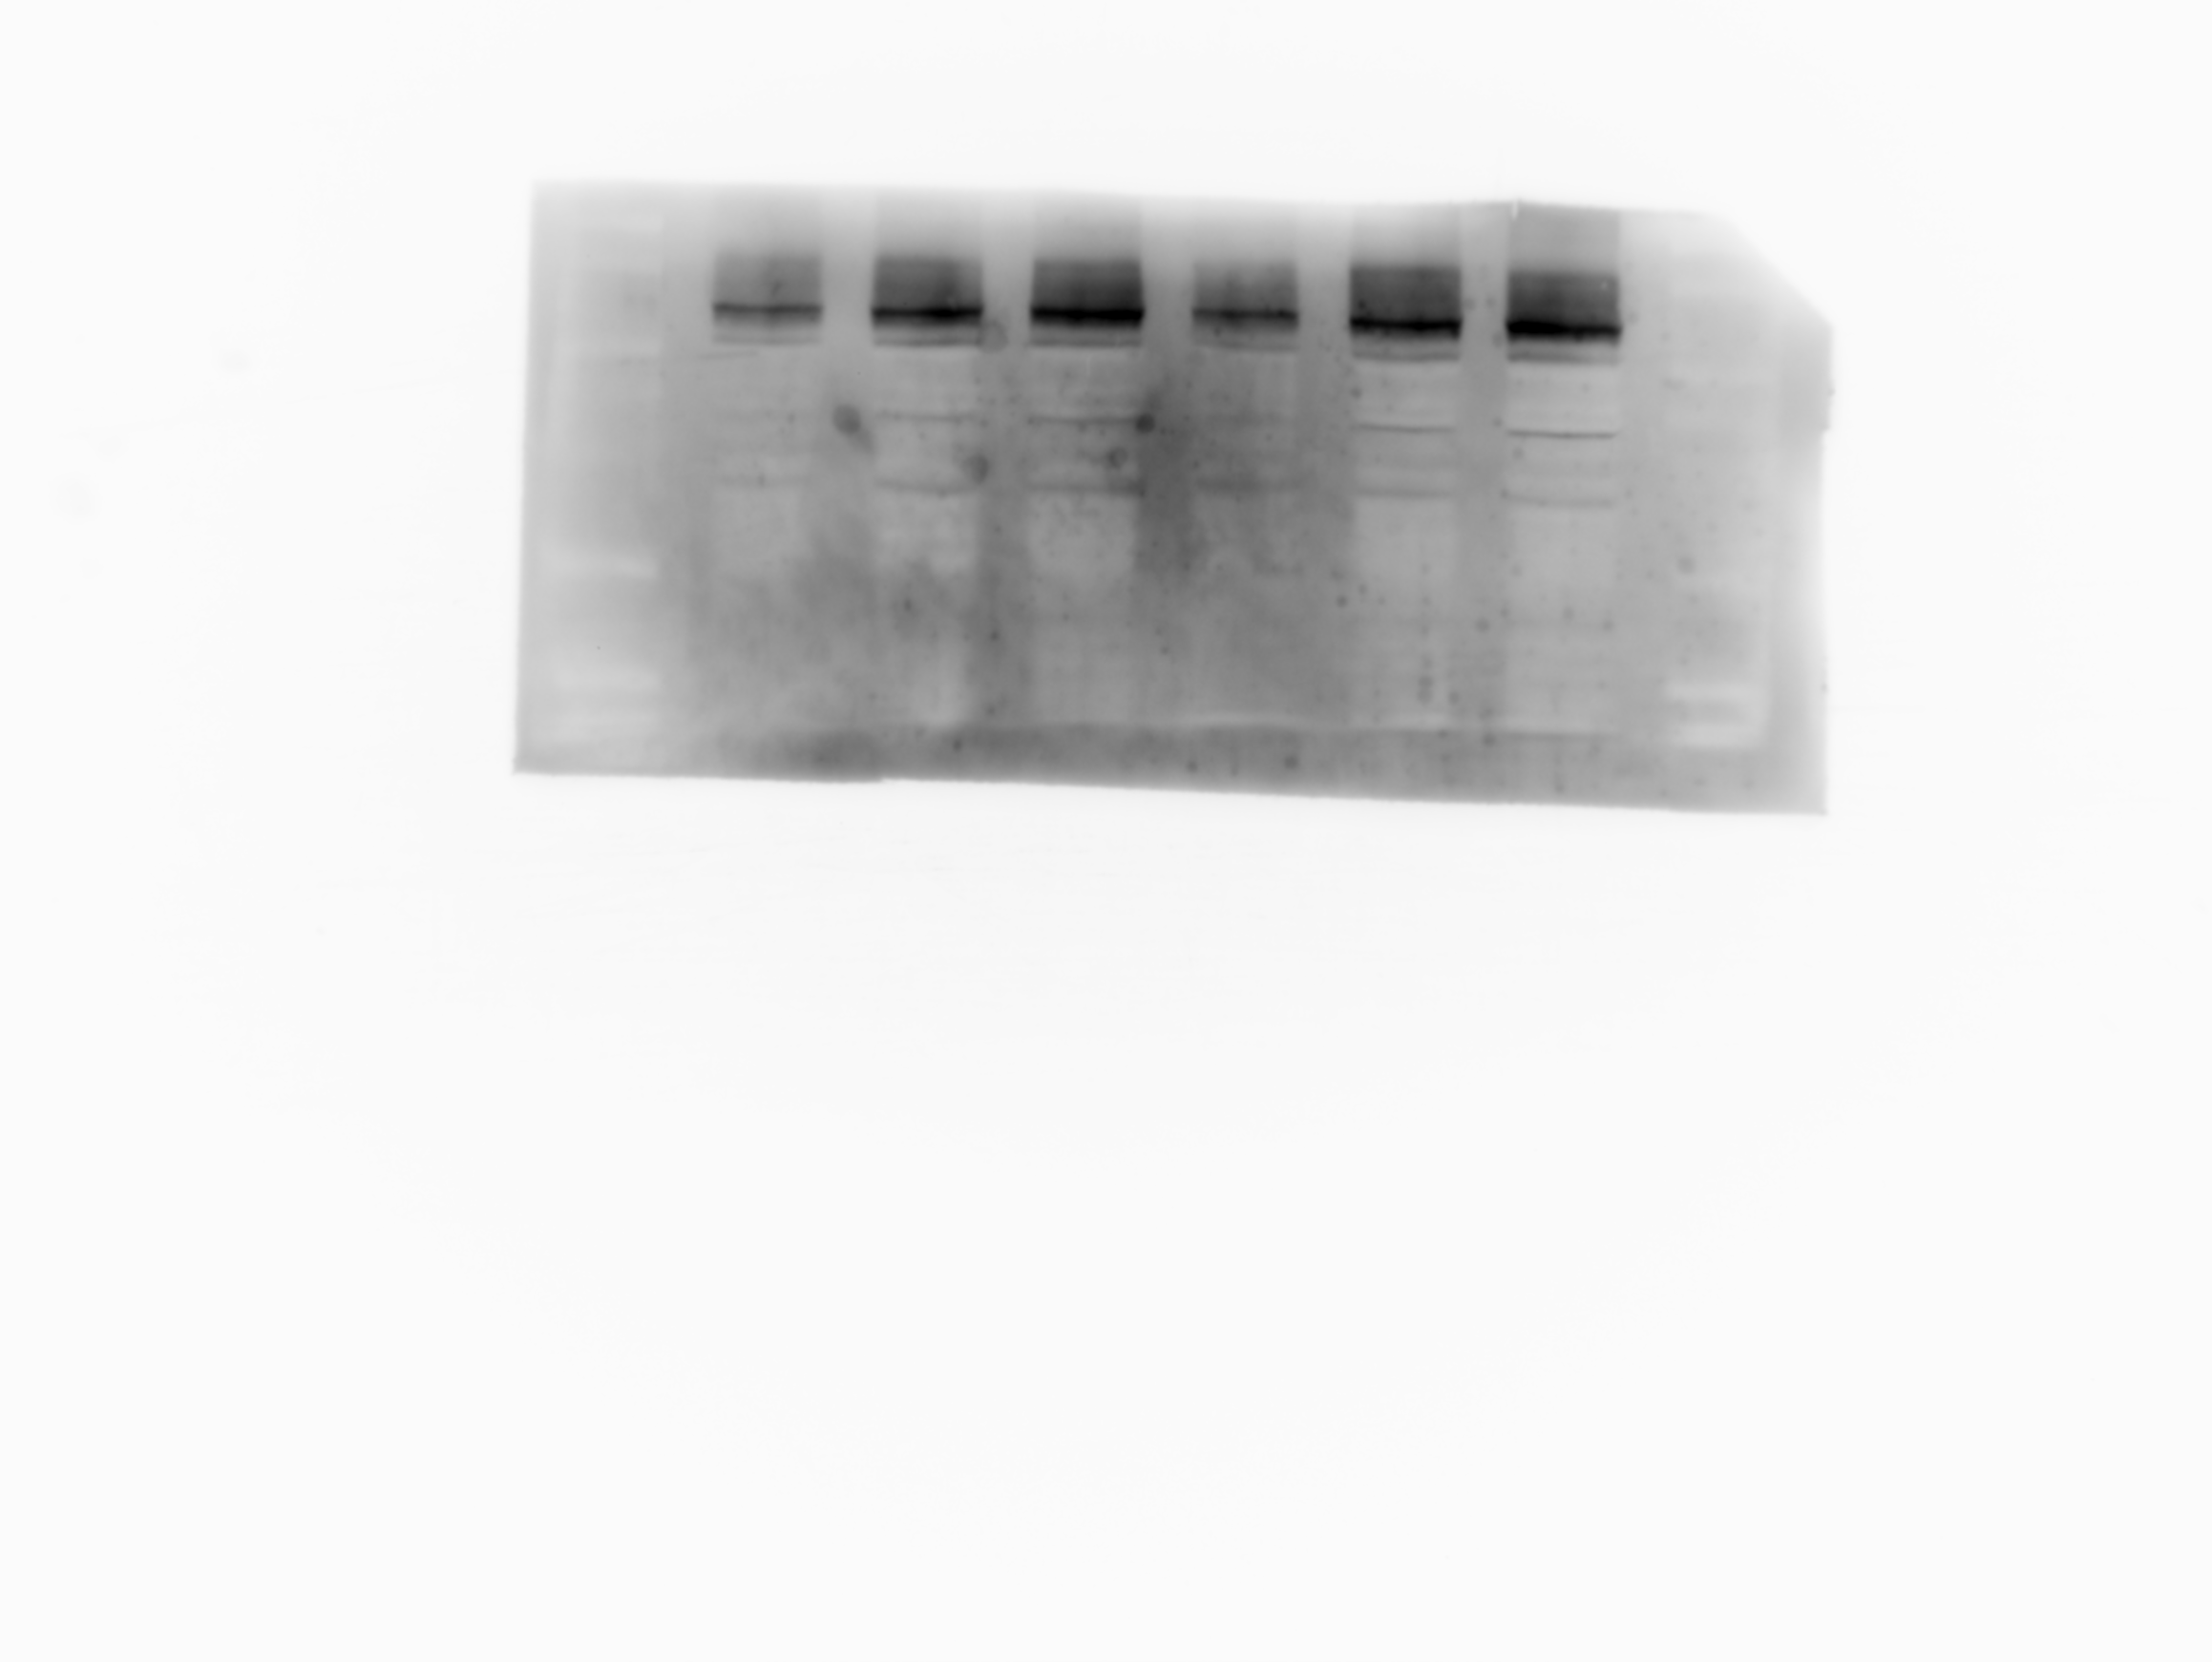


Figure 5 WB-β-actin


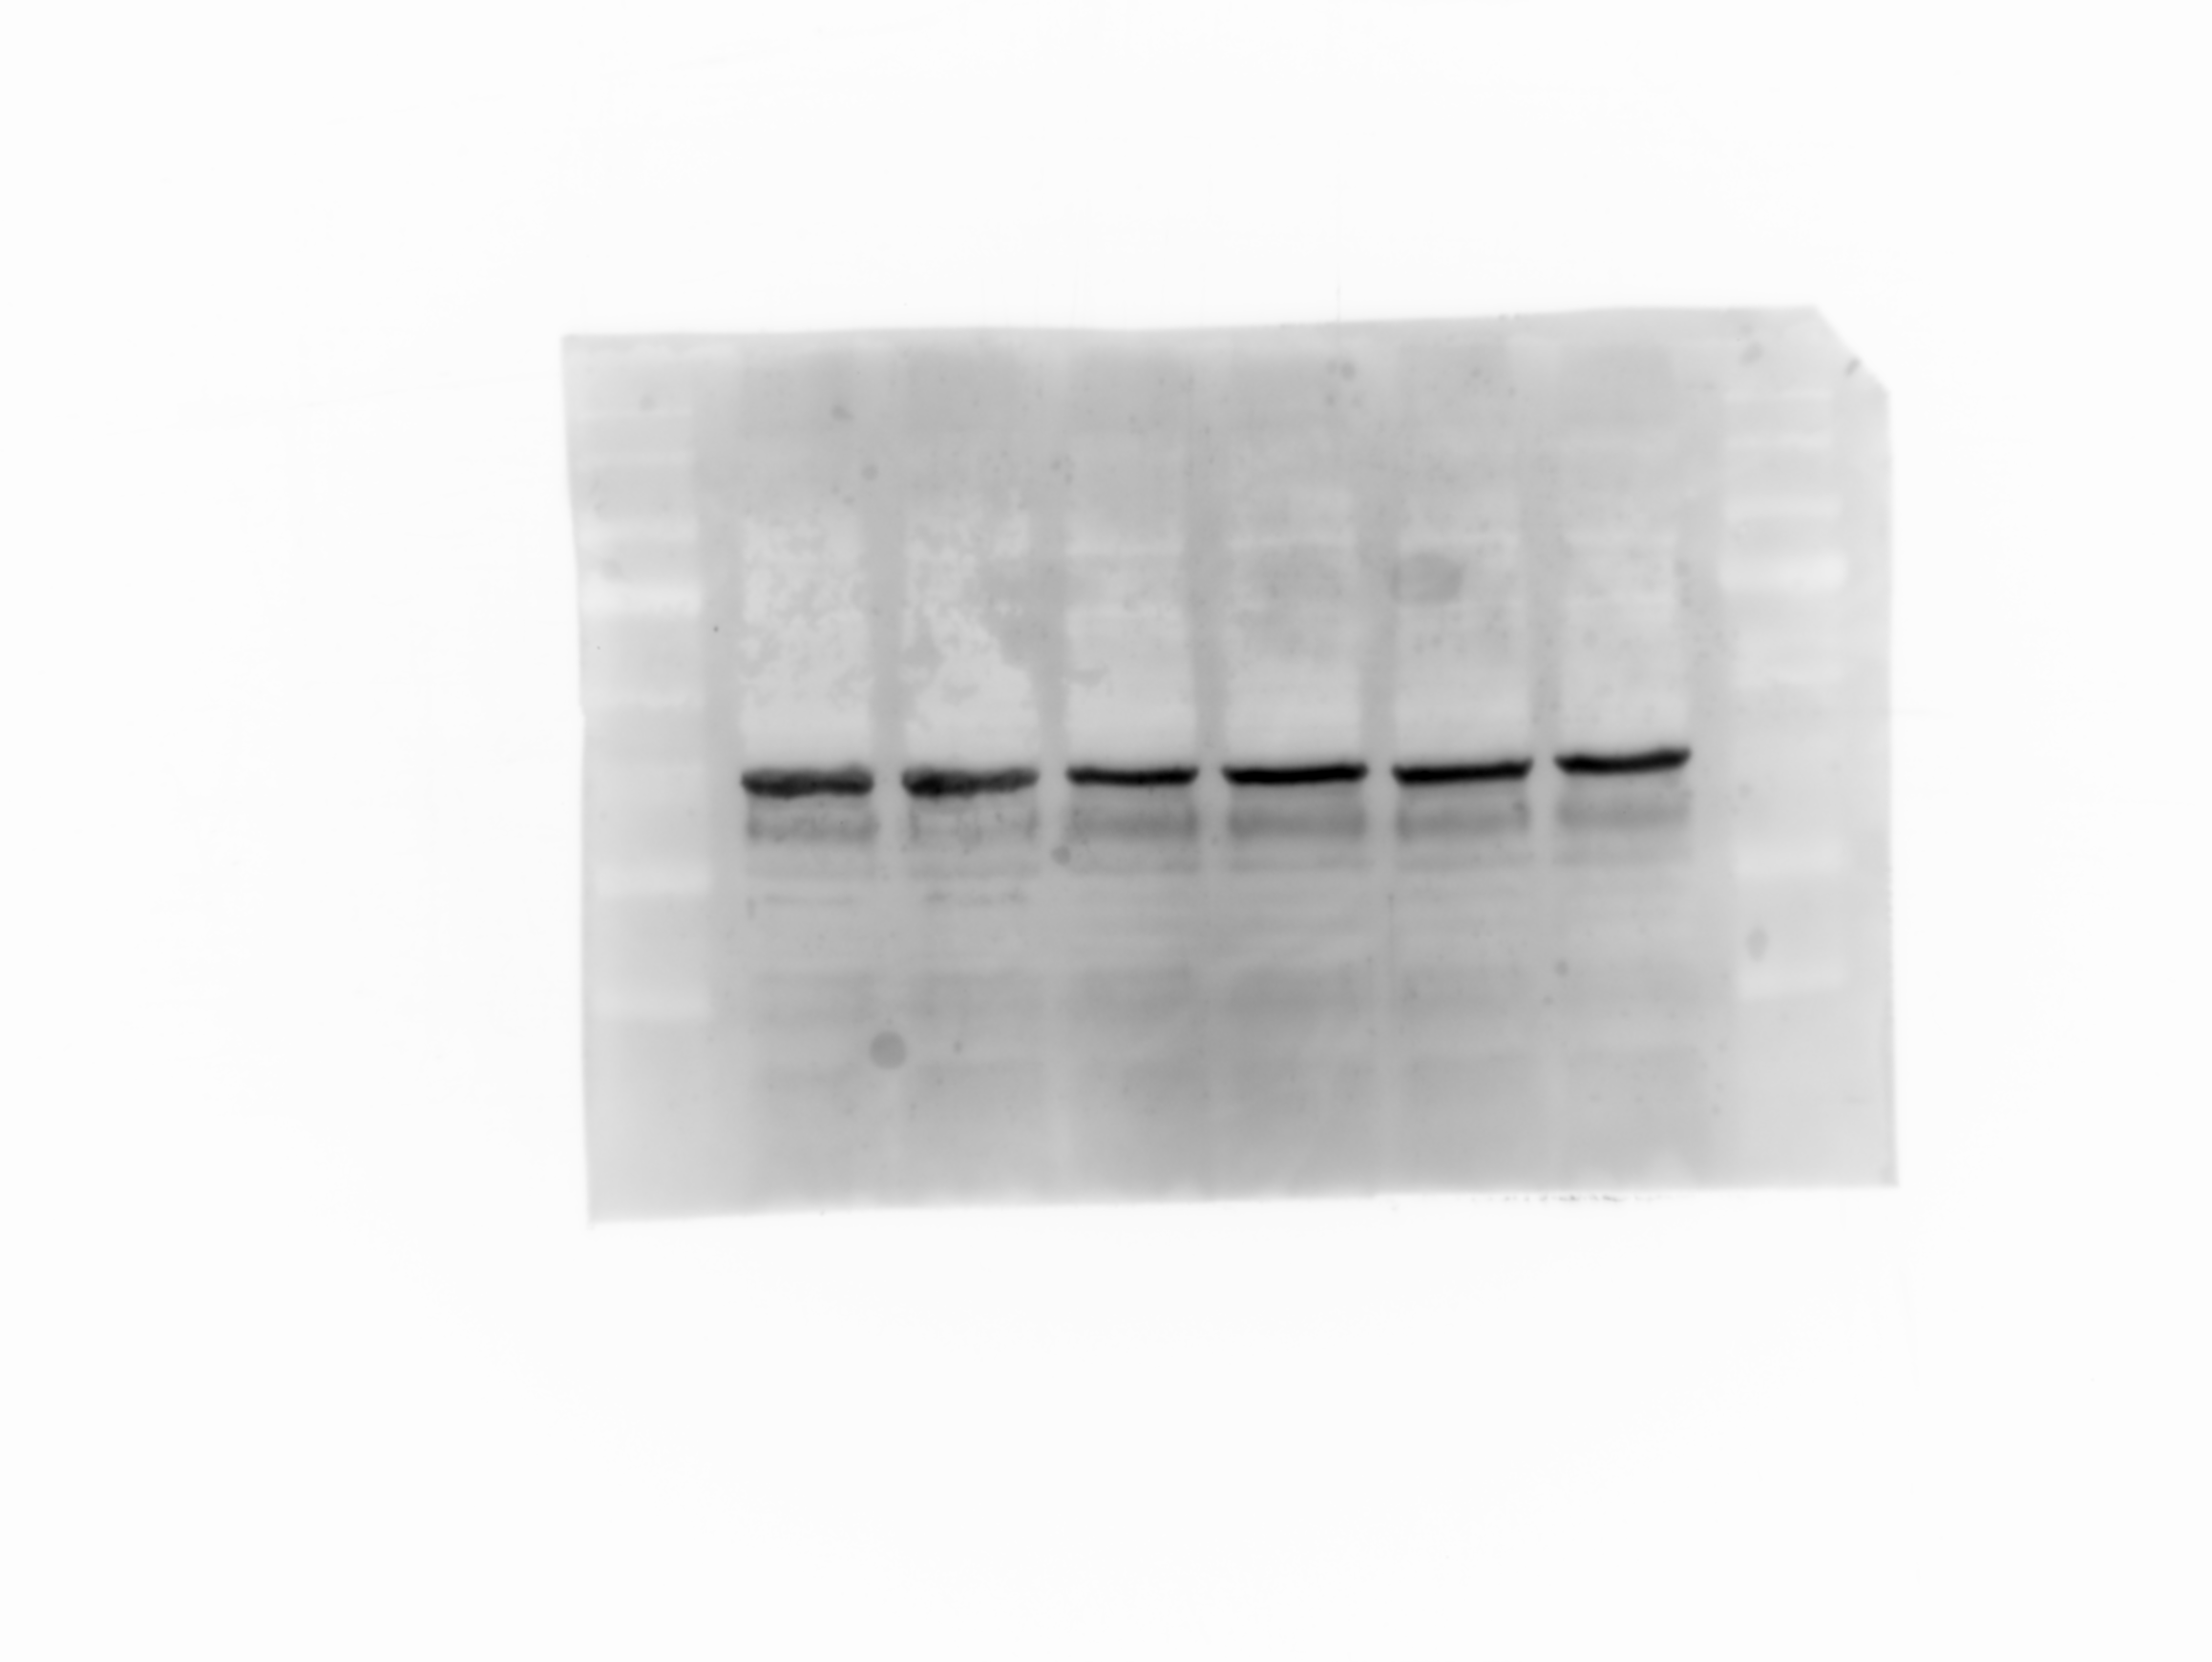


Figure 6 WB β-APP


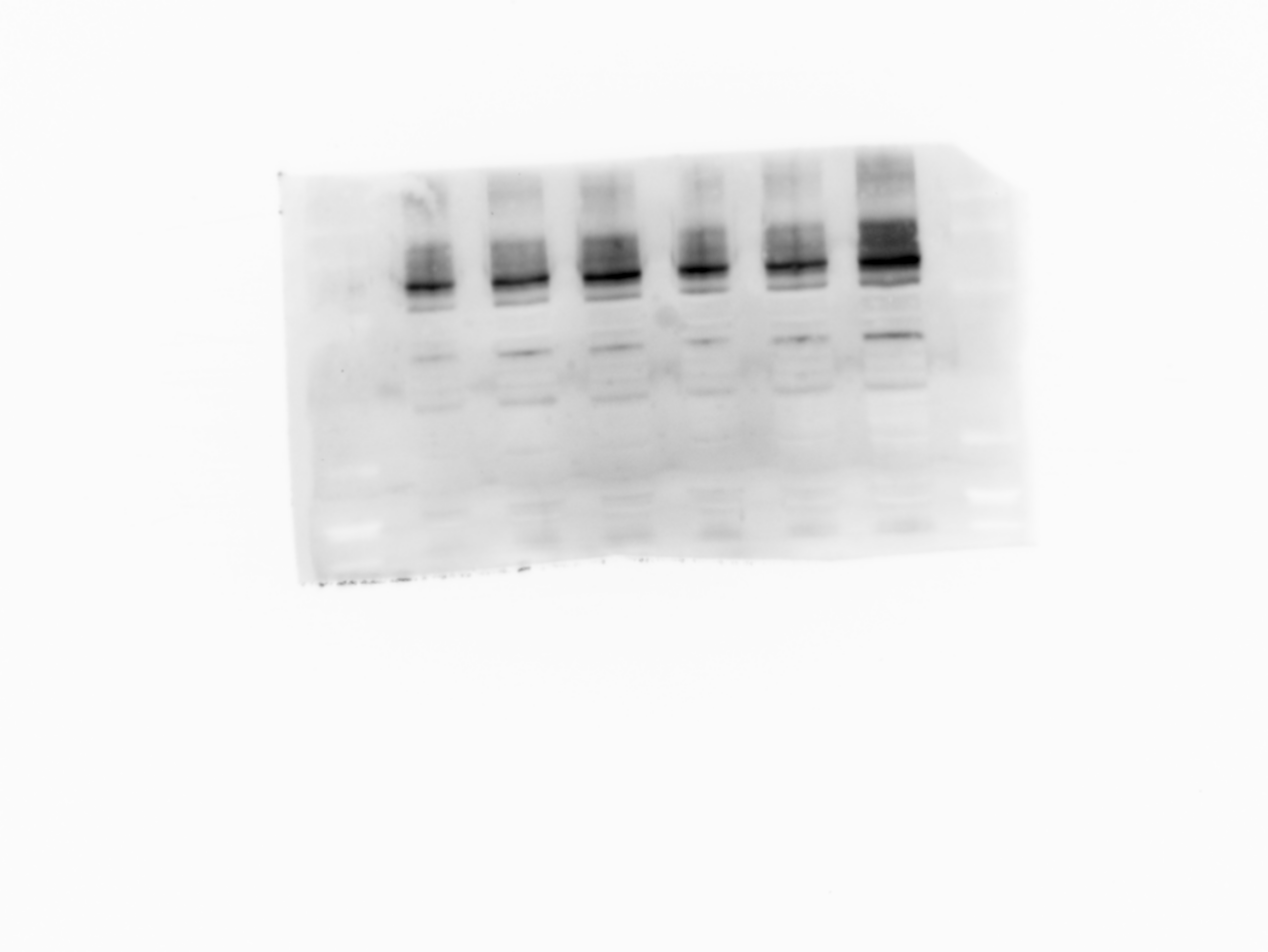


Figure 6 WB bcl-2


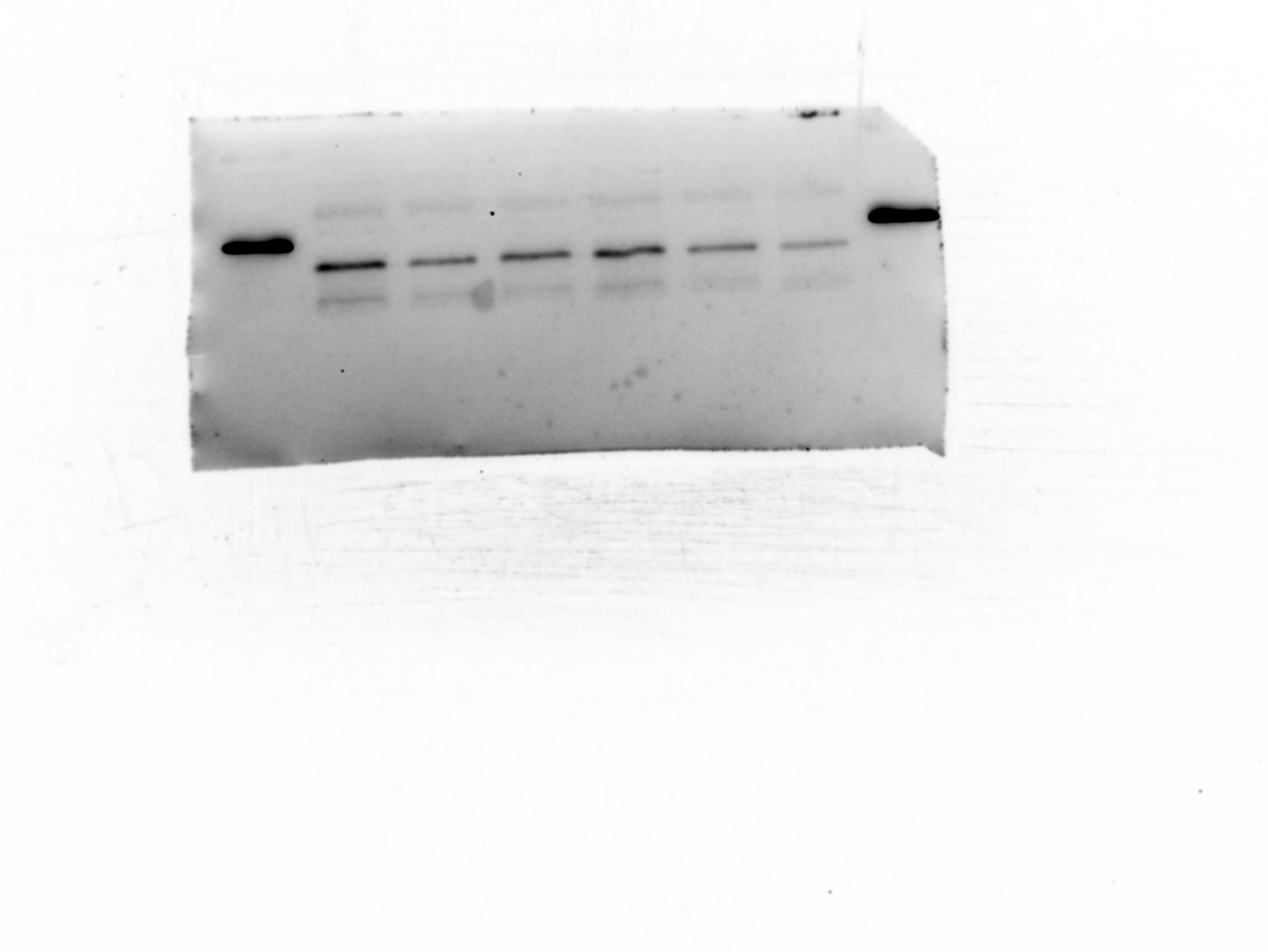


Figure 6 WB bax


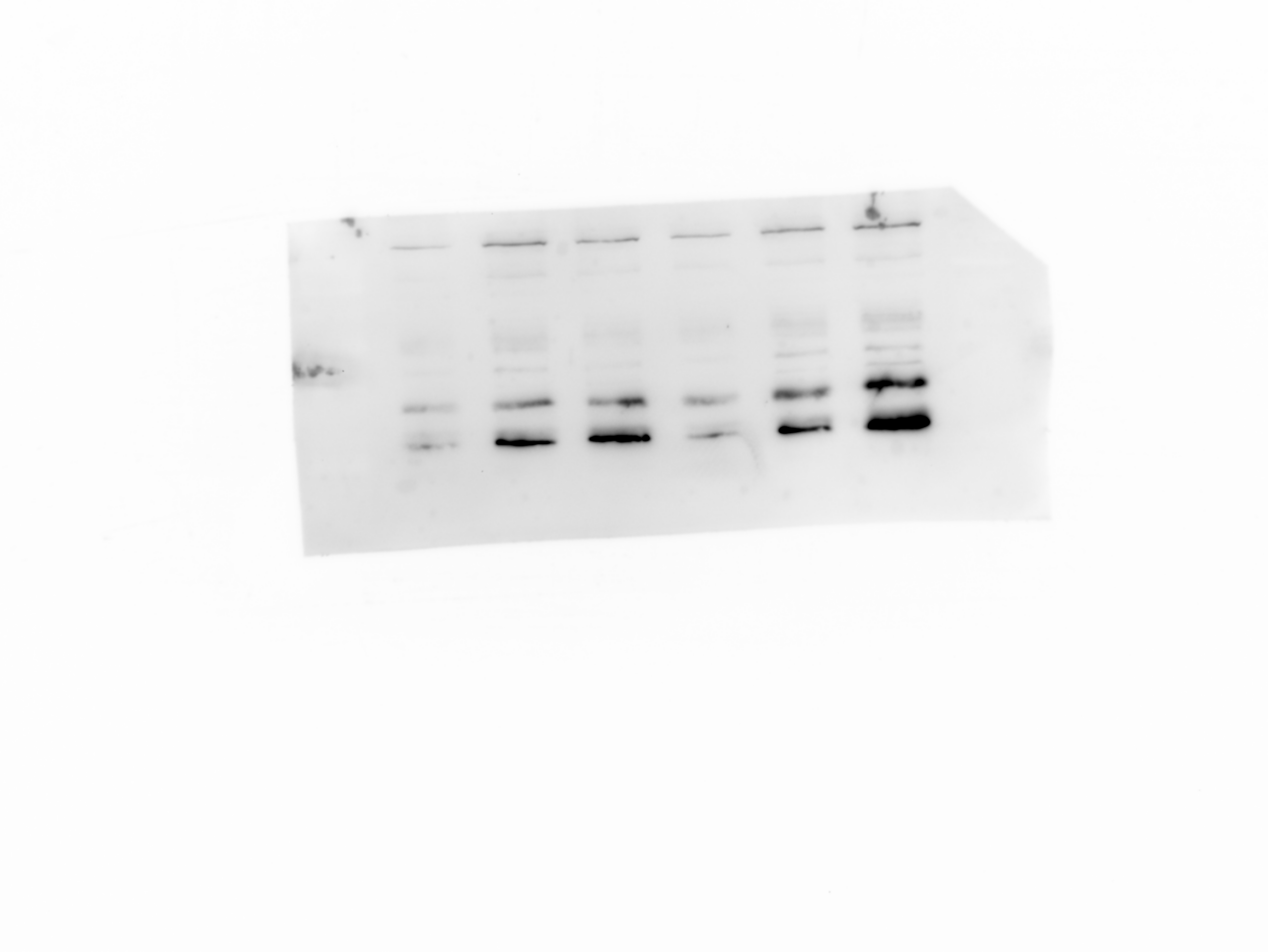


Figure 6 WB-cleaved caspase-3


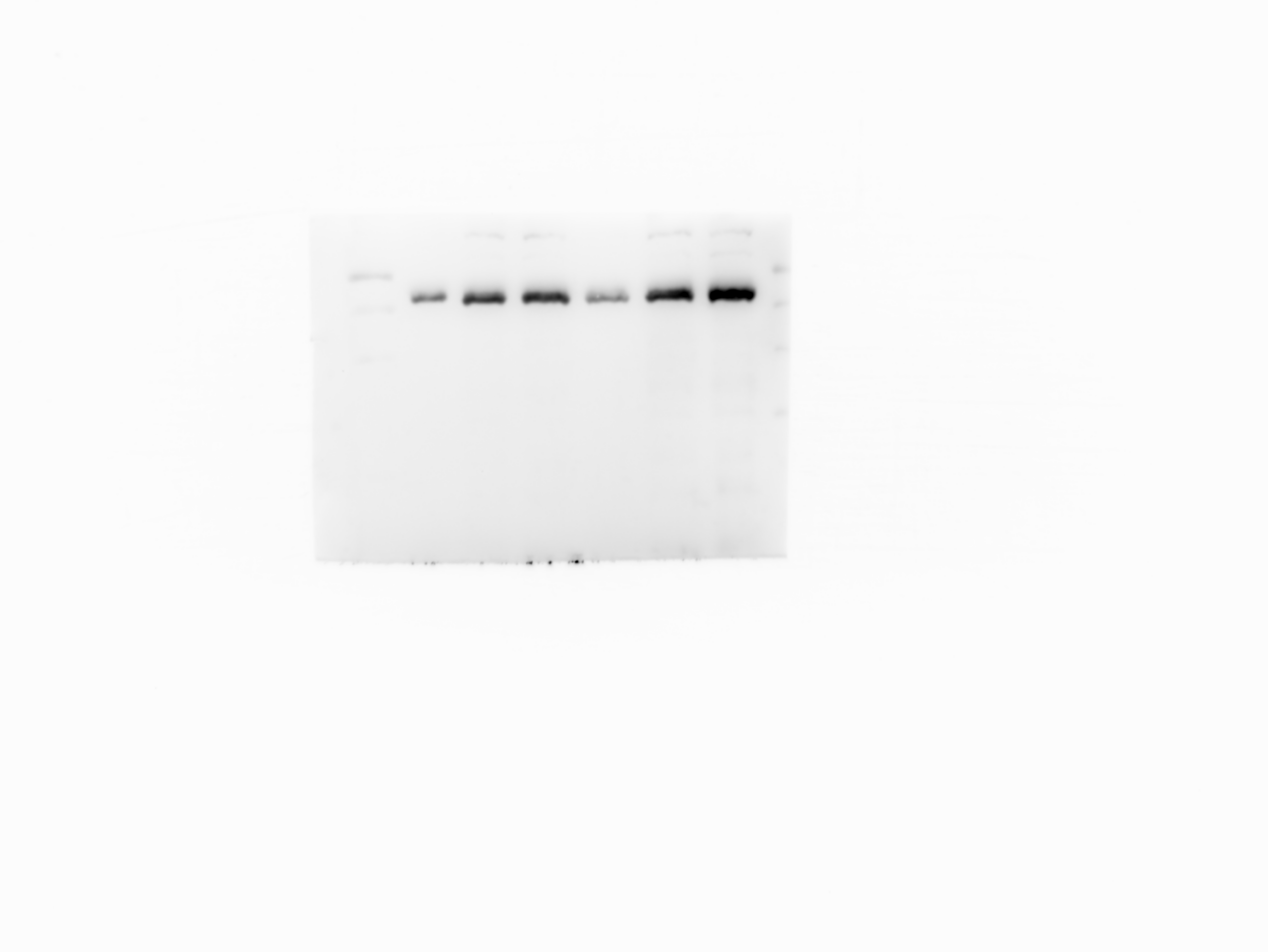


Figure 6 WB-β-actin


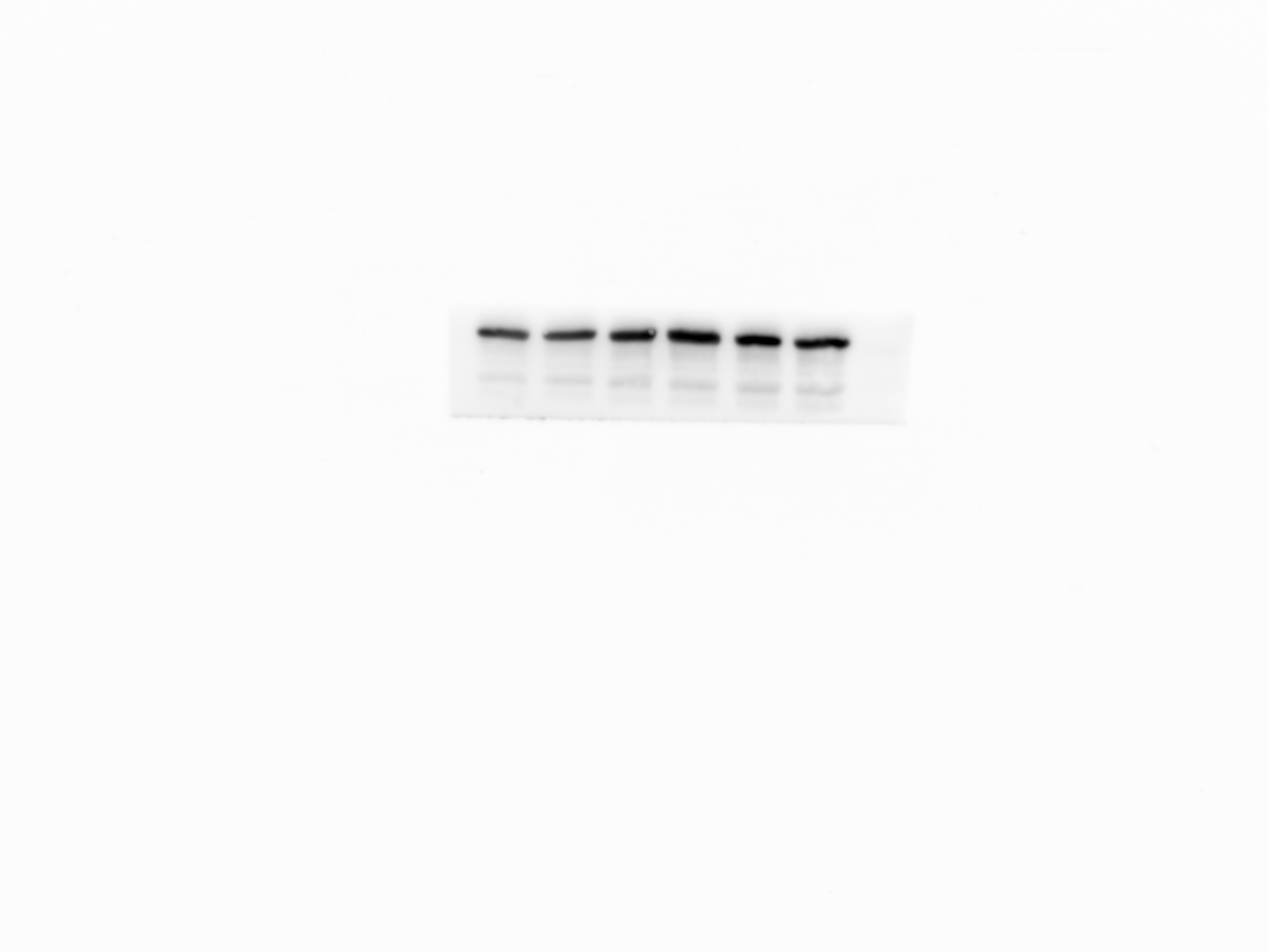


Figure 7.1 WB-ANXA3


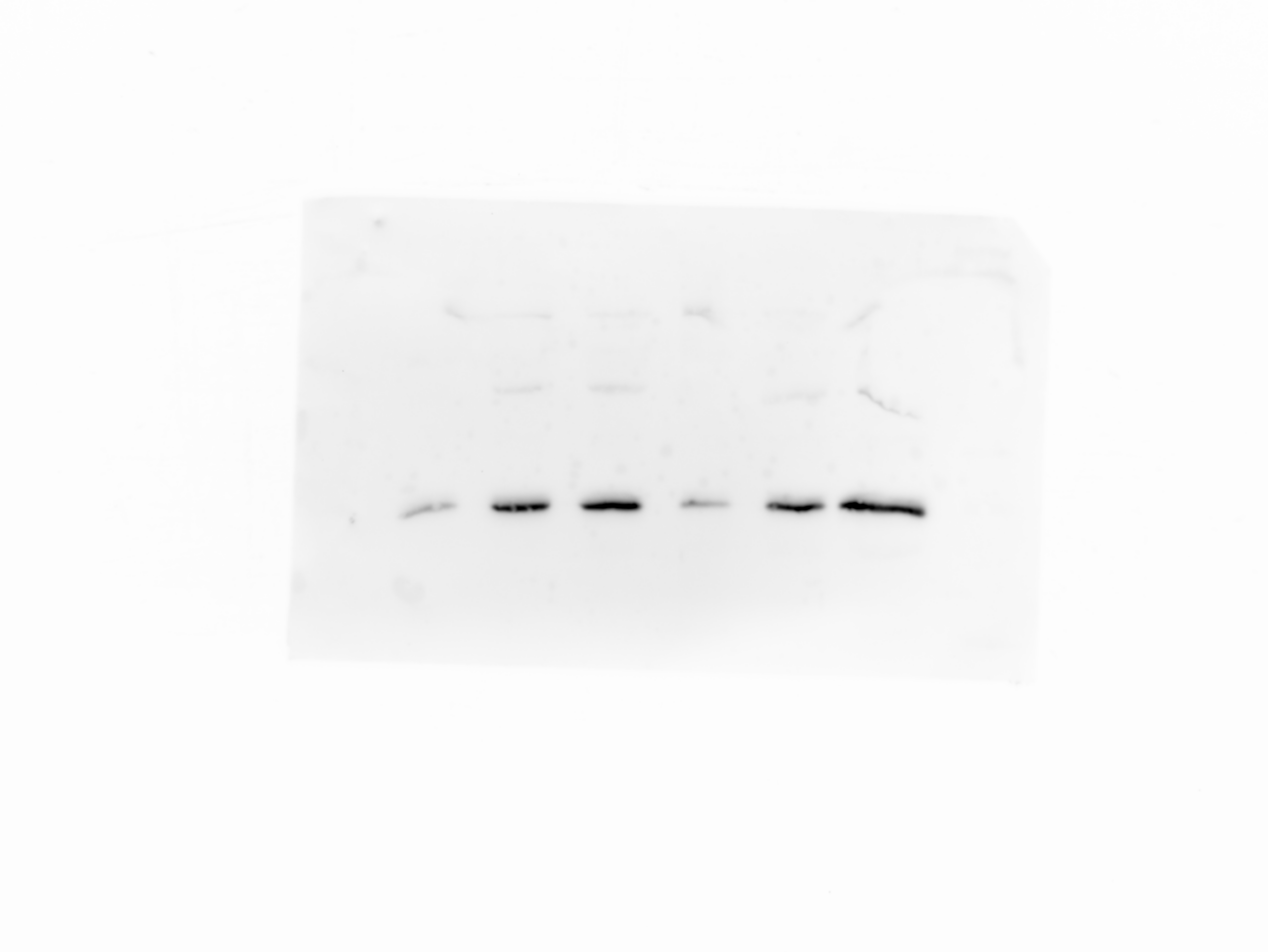


Figure7.1 WB-P-ATF2


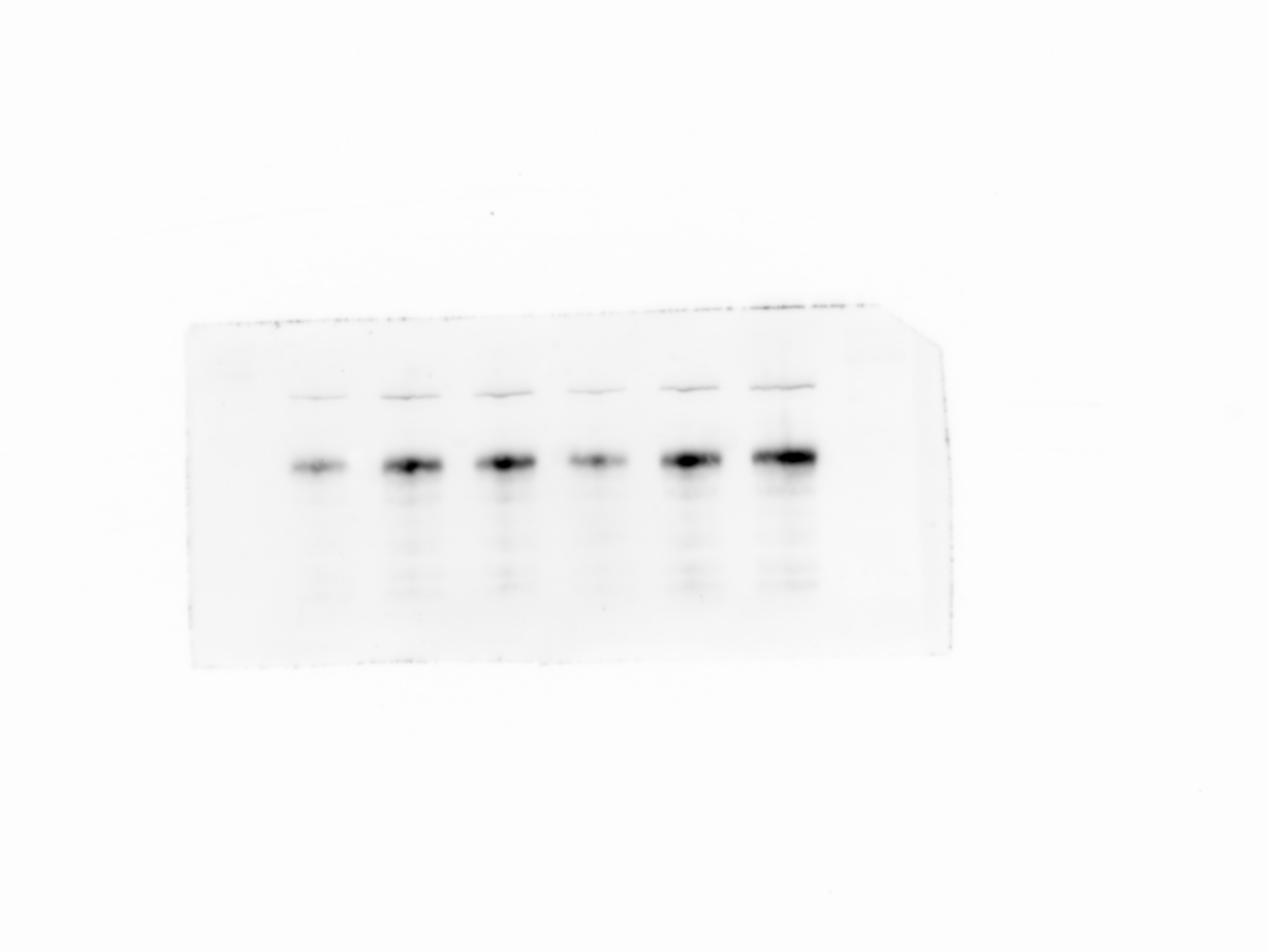


Figure 7.1 WB-ATF2


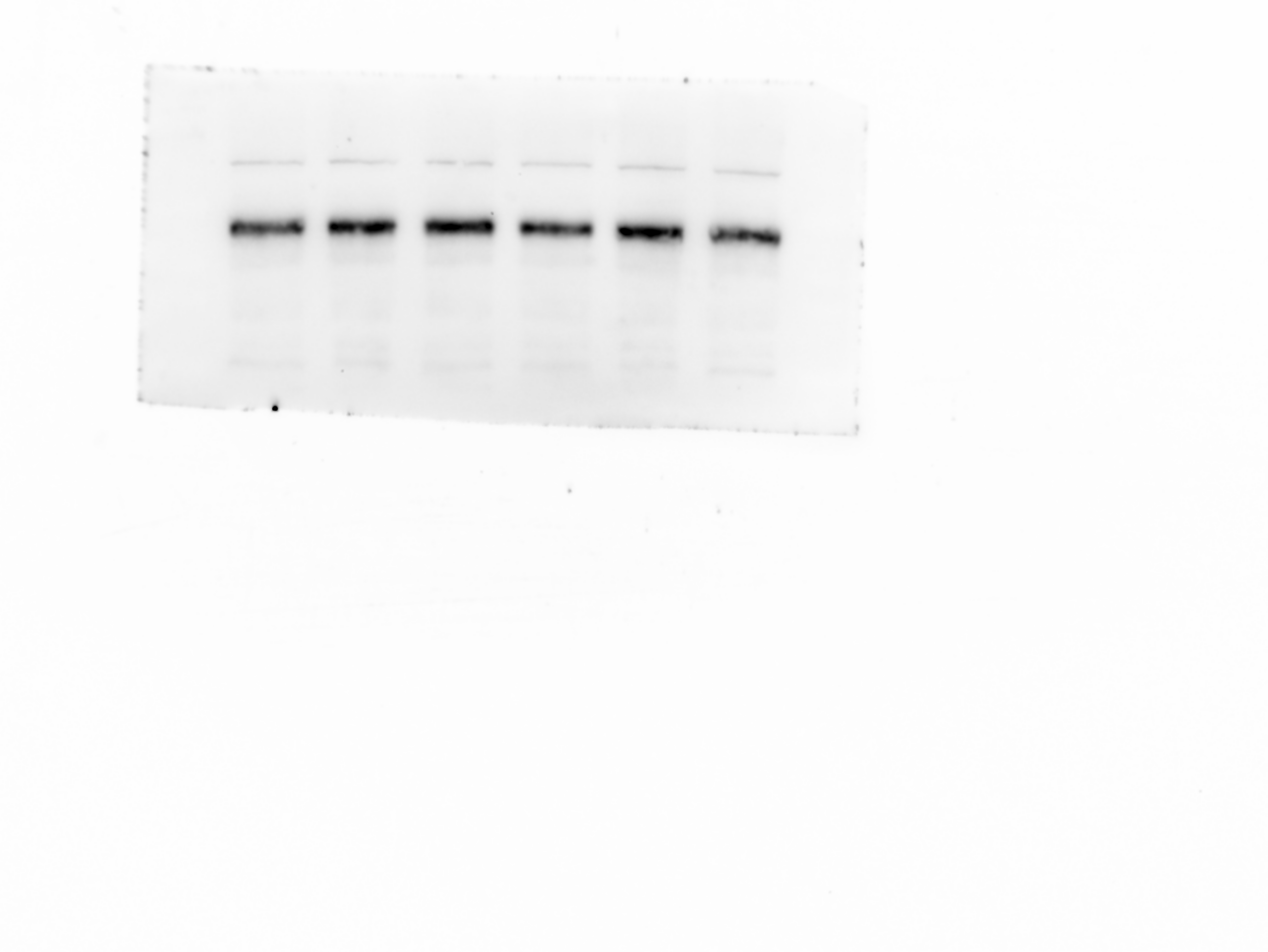


Figure 7.1 WB-P-NFκB-p65


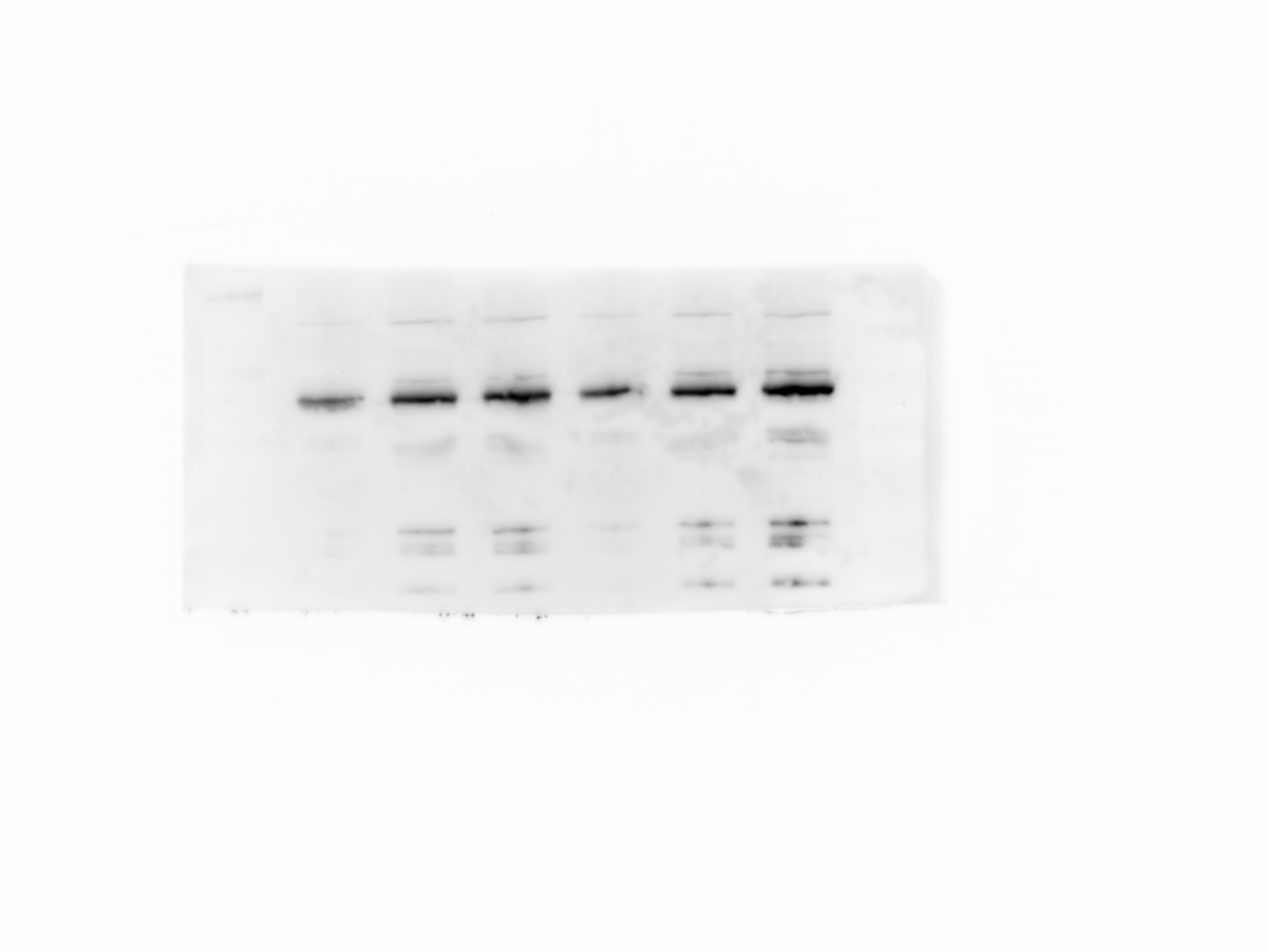


Figure 7.1 WB-NFκB-p65


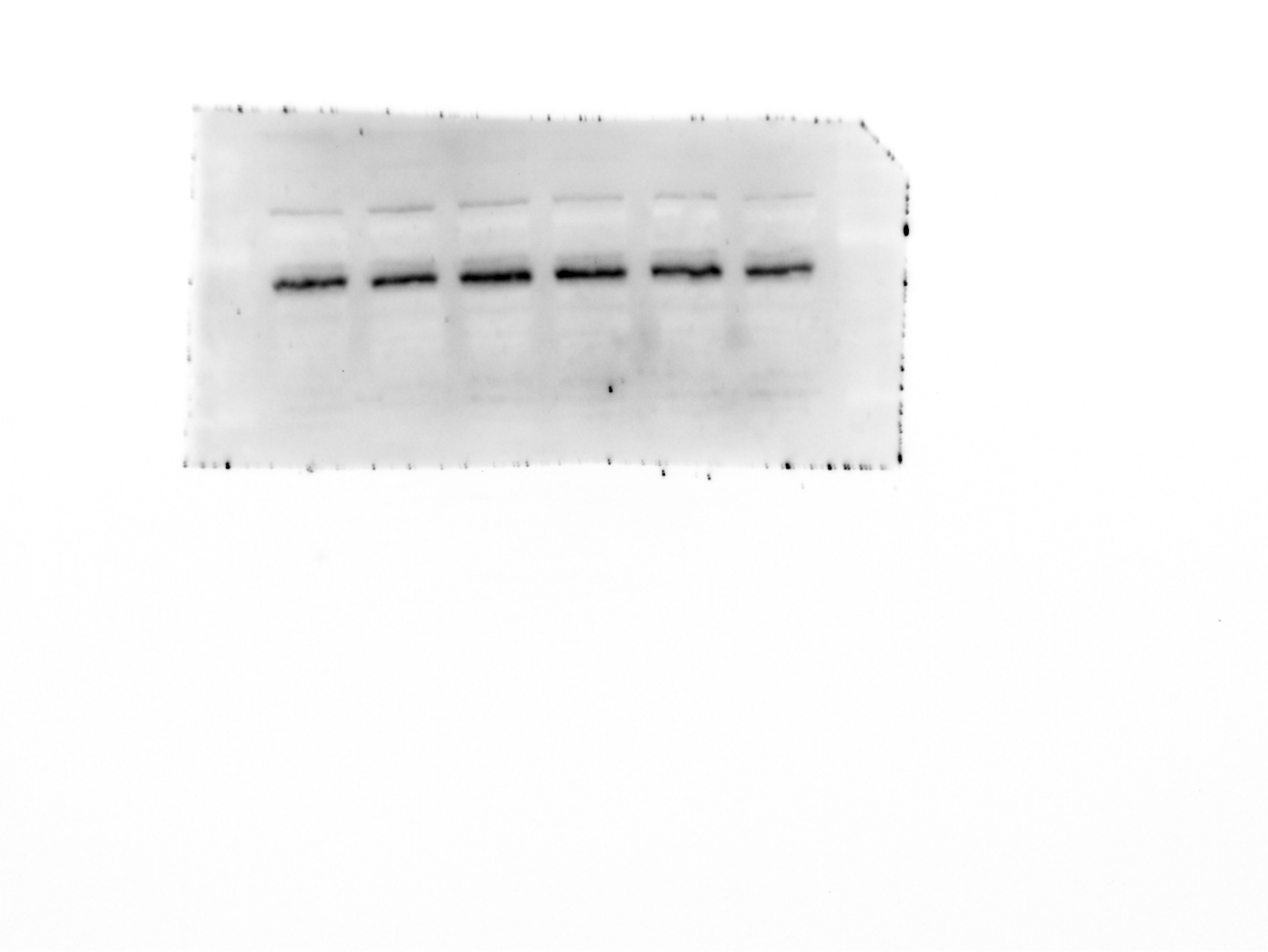


Figure 7.1 WB-β-actin


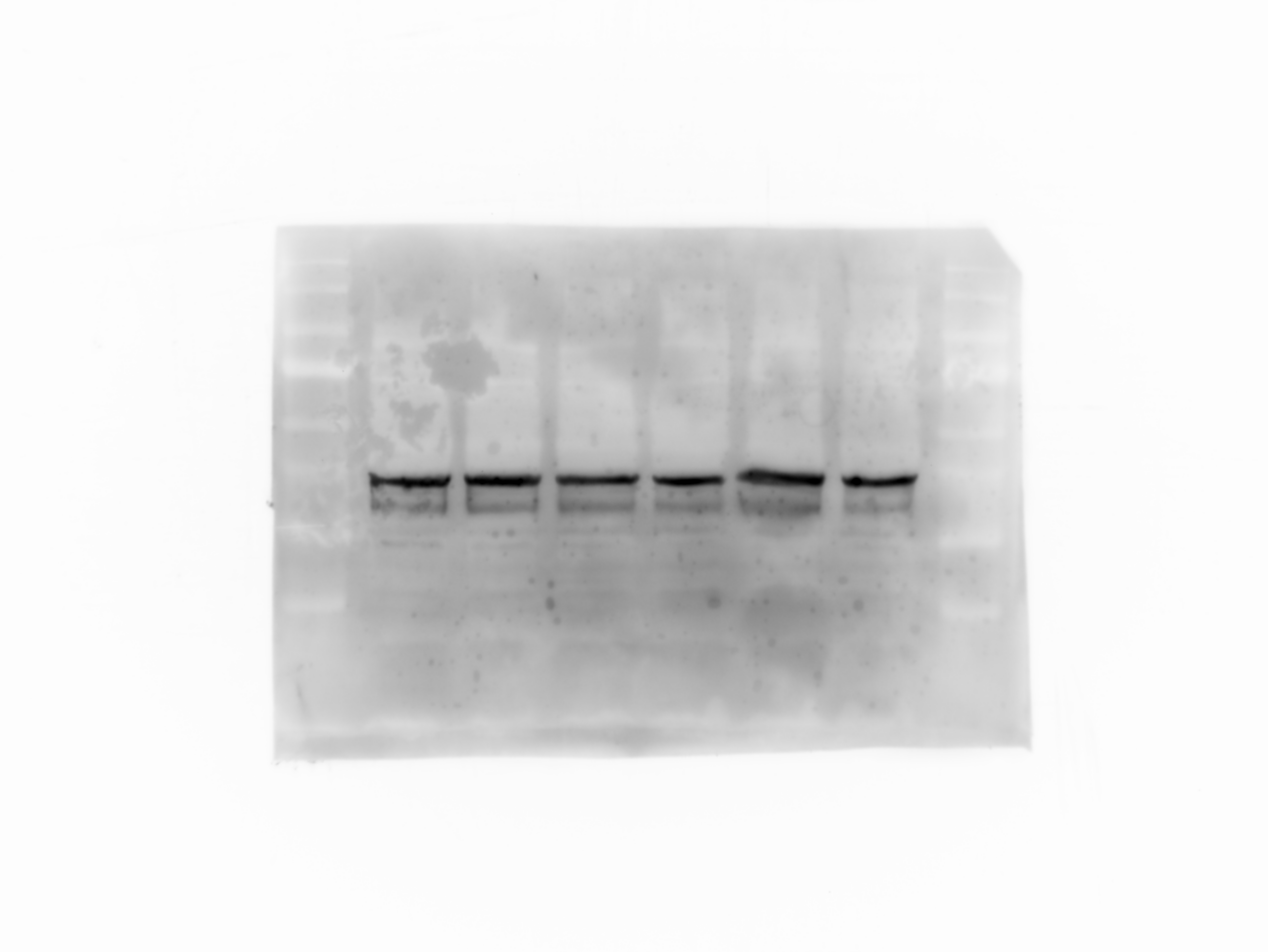


Figure 7.2 WB-ANXA3


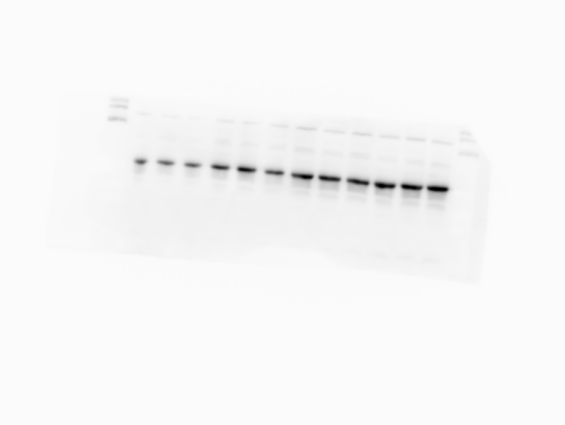


Figure7.2 WB-P-ATF2


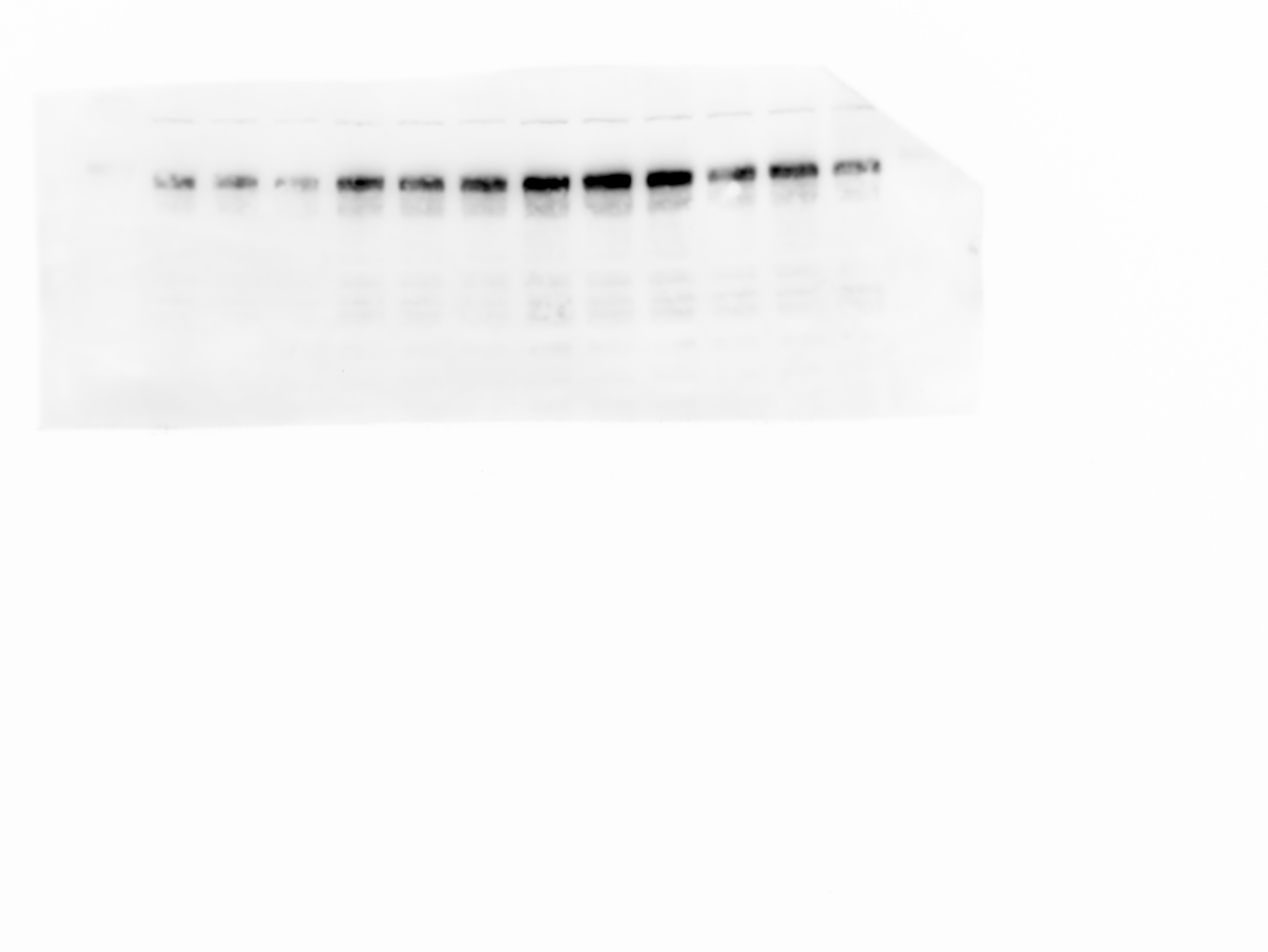


Figure 7.2 WB-ATF2


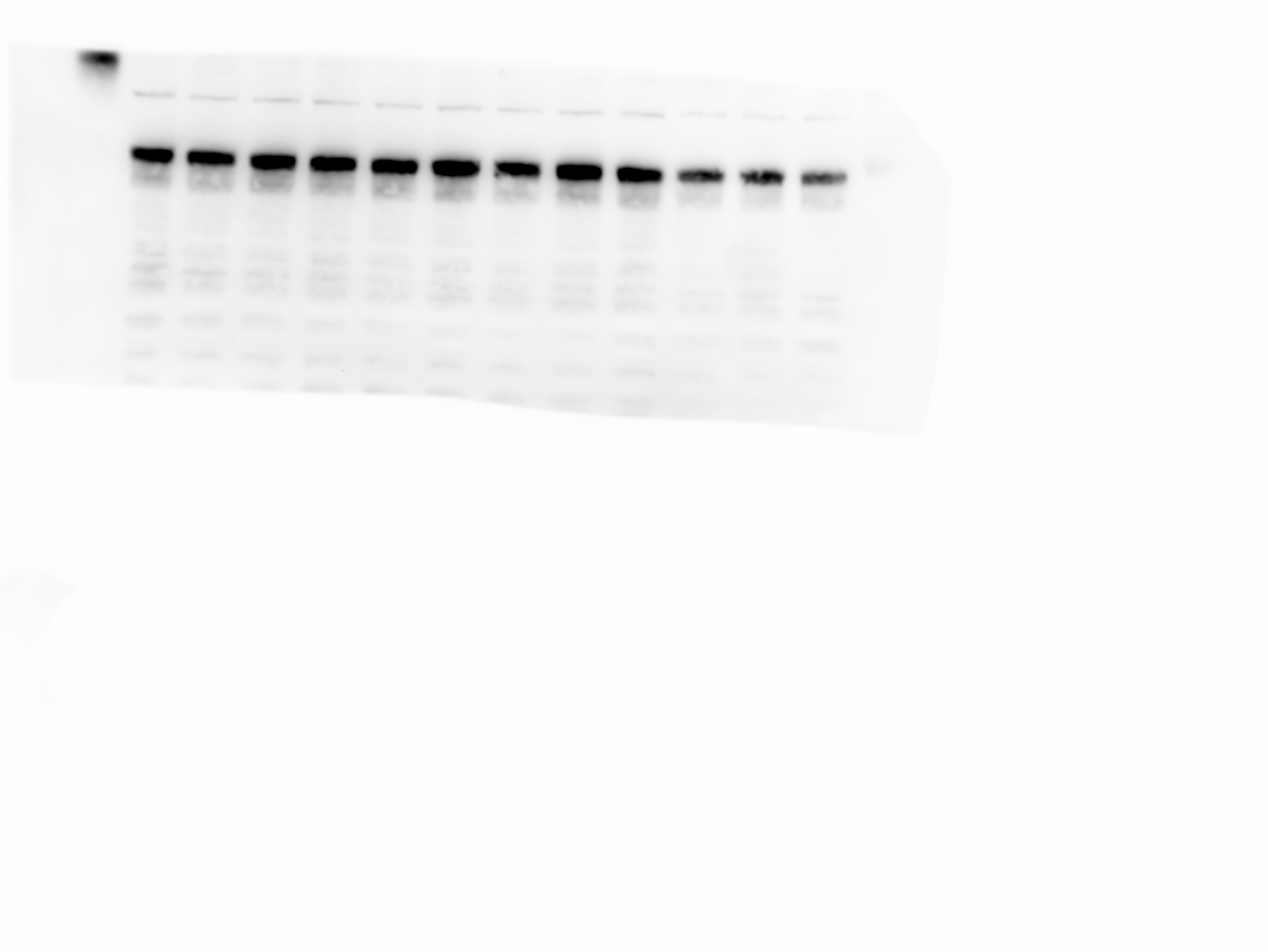


Figure 7.2 WB-P-NFκB-p65


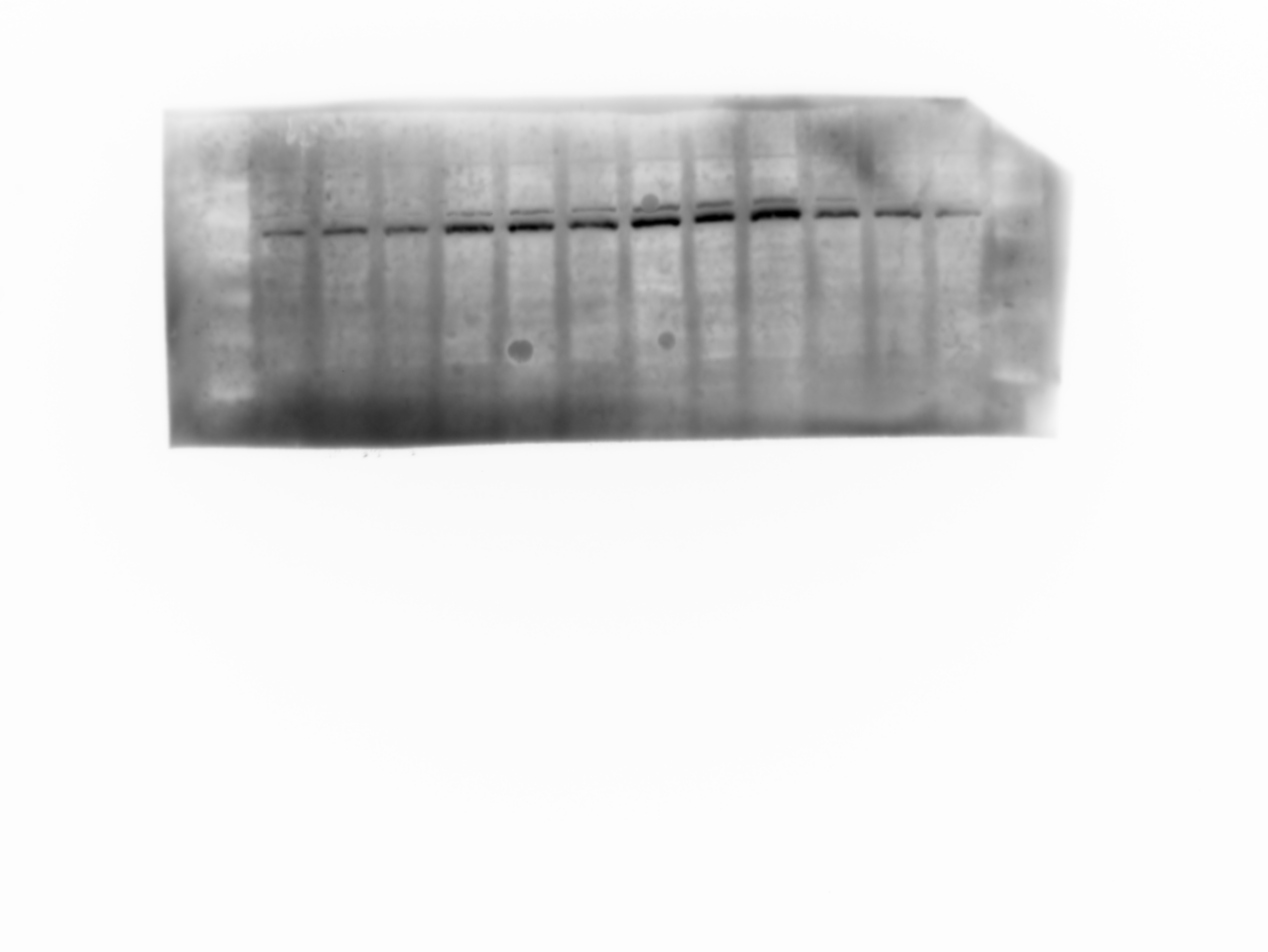


Figure 7.2 WB-NFκB-p65


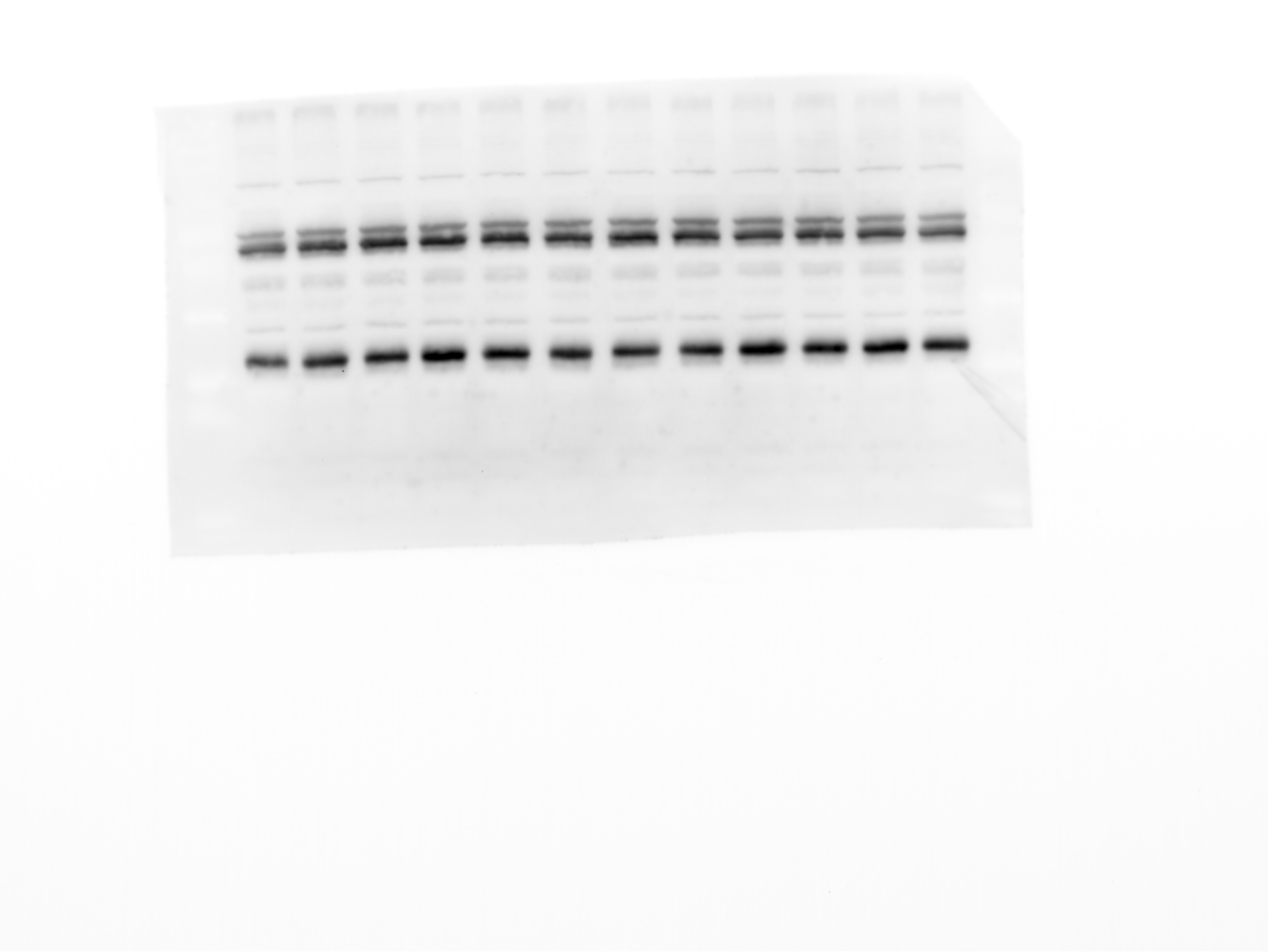


Figure 7.2 WB-β-actin


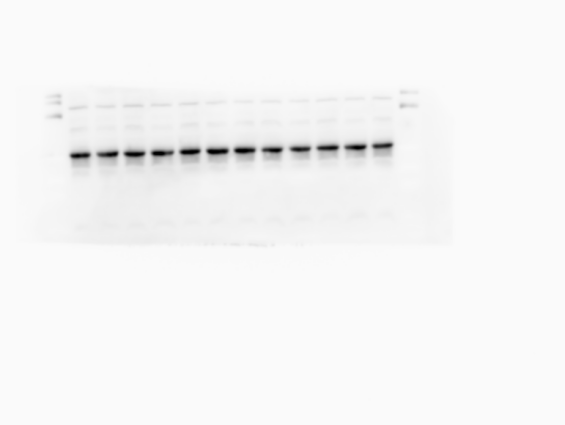

Supplement: Supplementary file 1 [file ed35b0ced08d07a0d1cd5419.docx]
